# Supplementary material for: A novel lactam-based AIE building block for high-performance deep-blue electroluminescent materials
Source: Royal Society of Chemistry journal article supplement (doi:10.1039/d6sc00940a), 2026-04-09
Supplement: d6sc00940a1.pdf [file d6sc00940a1.pdf]

## Supporting Information

### **A Novel Lactam-Based AIE Building Block for High-Performance Deep-Blue Electroluminescent Materials**

*Luyao Liu, <sup>a, 1</sup> Jingli Lou, <sup>a, 1</sup> Jiaxing Wan, <sup>a</sup> Yin Li, <sup>b</sup> Hao Xiong, <sup>a</sup> Yu Huang, <sup>a</sup> Dezhi Yang, <sup>a</sup> Han Zhang, <sup>c, \*</sup> Ben Zhong Tang<sup>d</sup> and Zhiming Wang<sup>a, \*</sup>*

a L. Liu, J. Lou, J. Wan, H. Xiong, Y. Huang, Prof D. Yang, Prof. Z. Wang

AIE Institute, State Key Laboratory of Luminescent Materials and Devices, Center for Aggregation-Induced Emission, South China University of Technology (SCUT), Guangzhou 510640, China

E-mail: [wangzhiming@scut.edu.cn](mailto:wangzhiming@scut.edu.cn)

b Dr. Y. Li

Jiangnan University, Institute of Intelligent Sport and Proactive Health, School of Physical Education, Wuhan, 430056, China

c Dr. H. Zhang

Department of Chemistry, Hong Kong Branch of Chinese National Engineering Research Center for Tissue Restoration and Reconstruction, The Hong Kong University of Science and Technology, Clear Water Bay, Kowloon, Hong Kong 999077, China.

E-mail: [cheungham@ust.hk](mailto:cheungham@ust.hk)

d Prof. B. Z. Tang

Shenzhen Institute of Aggregate Science and Technology, School of Science and Engineering, The Chinese University of Hong Kong, Shenzhen, Shenzhen 518172, China

<sup>1</sup> Luyao Liu and Jingli Lou contributed equally to this work.

## Contents

### S-1 Materials and Measurement

### S-2 Experimental Section

### S-3 X-ray Crystallography

### S-4 Computational Methods

### S-5 Additional Spectra and Data

### S-6 Device Fabrication

### S-7 NMR Spectroscopies and Mass spectrums

### S-8 Reference

## S-1 Materials and Measurement

All the reagents and solvents were purchased from commercial sources and used as received. The final products were subjected to vacuum sublimation to further improve purity before photoluminescence (PL) and electroluminescence (EL) properties investigations.  $^1\text{H}$  and  $^{13}\text{C}$  NMR spectra were recorded on a Bruker AV 500 spectrometer in  $\text{CH}_2\text{Cl}_2$  at room temperature. High resolution mass spectra (HRMS) were tested on Agilent1290/Bruker maXis impact. Thermogravimetric analysis (TGA) was performed on a TA TGA Q5000 from 30 °C to 800 °C under dry nitrogen at a heating rate of 10 °C  $\text{min}^{-1}$ . The differential scanning calorimetry (DSC) analysis was carried out on a DSC Q1000 from 30 °C to 300 °C under dry nitrogen at a heating rate of 5 °C  $\text{min}^{-1}$ . Cyclic voltammetry (CV) were performed on a CHI 610E A14297 in a solution of tetra-n-butylammonium hexafluorophosphate ( $\text{Bu}_4\text{NPF}_6$ ) (0.1 M) in dichloromethane (DCM) or dimethylformamide (DMF) at a scan rate of 100  $\text{mV s}^{-1}$ , using a platinum wire as the auxiliary electrode, a glass carbon disk as the working electrode and  $\text{Ag}/\text{Ag}^+$  as the reference electrode. Ionization Potential ( $\text{IP}_{\text{CV}}$ ) =  $[\text{E}_{\text{OX}} - \text{E}_{1/2}(\text{Fc}/\text{Fc}^+) + 4.8]$  eV, Electron Affinities ( $\text{EA}_{\text{CV}}$ ) =  $[\text{E}_{\text{red}} - \text{E}_{1/2}(\text{Fc}/\text{Fc}^+) + 4.8]$  eV, where  $\text{E}_{\text{ox}}$  and  $\text{E}_{\text{red}}$  represent the onset oxidation potential and the reduction potential relative to  $\text{Fc}/\text{Fc}^+$  (4.8 eV), respectively, and  $\text{E}_{1/2}(\text{Fc}/\text{Fc}^+)$  represents the calibrated value. UV-vis absorption spectra were recorded with a Shimadzu UV-2600 spectrophotometer. Measurements of PL spectra were carried out on Horiba Fluoromax-4 spectrofluorometer. Fluorescence quantum yields in solutions and solid films were measured using a Hamamatsu absolute PL quantum yield spectrometer C11347 Quantaury QY. Fluorescence lifetimes were determined on an Edinburgh FLS1000 spectrometer.

## S-2 Experimental Section

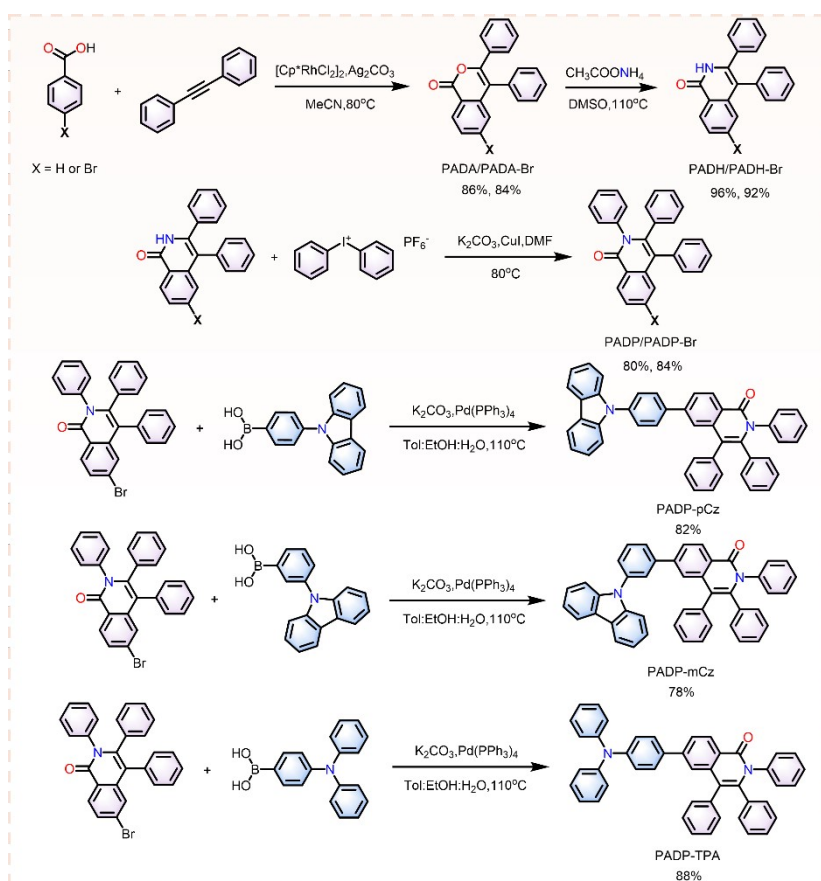

**Scheme S1.** Molecular structures and synthetic routes of the **PADD**, **PADD-pCz**, **PADD-mCz** and **PADD-TPA**.

**3,4-diphenyl-1H-isochromen-1-one (PADA):** Benzoic acid (1.0 g, 8.19 mmol), 1,2-diphenylethyne (1.75 g, 9.83 mmol), bis [(pentamethylcyclopentadienyl)dichloro-rhodium] (253.41 mg, 0.41 mmol) and silver carbonate (4.52 g, 16.39 mmol) were placed in a 250 mL round bottom flask under nitrogen. Then 80 mL of acetonitrile was injected into the bottle, and the reaction mixture was refluxed in a nitrogen atmosphere at 80 °C for 24 hours. After the reaction finished, cooling to room temperature. Then, the mixture was poured into the water solution and extracted with dichloromethane three times. Finally, the extract dried over anhydrous  $\text{MgSO}_4$  and evaporated under reduced pressure to obtain the crude product, which was purified by silica gel column chromatograph. The white powder of PADA was obtained in 86% yield.  $^1\text{H}$  NMR (500 MHz,  $\text{CD}_2\text{Cl}_2$ )  $\delta$  8.36 (d,  $J = 8.0$  Hz, 1H), 7.66 (t,  $J = 7.7$  Hz, 1H), 7.55 (t,  $J = 7.5$  Hz, 1H), 7.45 – 7.39 (m,  $J = 3.5$  Hz, 3H), 7.36 – 7.32 (m, 2H), 7.29 – 7.25 (m, 3H), 7.24 – 7.18 (m, 3H).  $^{13}\text{C}$  NMR (101 MHz,  $\text{CD}_2\text{Cl}_2$ )  $\delta$  162.51, 151.51, 139.39, 135.16,

134.92, 133.77, 131.83, 129.81, 129.77, 129.51, 129.47, 128.66, 128.62, 128.42, 125.92, 121.05, 117.53.

**3,4-diphenylisoquinolin-1(2H)-one (PADH):** PADA (1 g, 3.35 mmol) and ammonium acetate (2.07 g, 26.80 mmol) were dissolved in dimethyl sulfoxide (20 mL) under a nitrogen atmosphere. Then the reaction mixture was stirred and refluxed in a nitrogen atmosphere at 110 °C for 12 hours. As the reaction solution cooled to room temperature, added a certain amount of deionized water to the reaction solution. Upon the addition of water, a white solid precipitated out, which can be obtained as PADH through suction filtration. The white solid of PADH was obtained in 96% yield. <sup>1</sup>H NMR (500 MHz, CD<sub>2</sub>Cl<sub>2</sub>) δ 9.64 (s, 1H), 8.40 (dd, J = 8.1, 1.5 Hz, 1H), 7.63 – 7.58 (m, 1H), 7.53 – 7.48 (m, 1H), 7.36 – 7.25 (m, 9H), 7.23 – 7.18 (m, 2H). <sup>13</sup>C NMR (126 MHz, CD<sub>2</sub>Cl<sub>2</sub>) δ 163.05, 139.34, 137.92, 136.43, 135.71, 133.18, 132.43, 130.01, 129.15, 128.87, 128.78, 127.82, 127.72, 127.08, 126.19, 125.56, 117.76.

**2,3,4-triphenylisoquinolin-1(2H)-one (PADP):** PADH (1 g, 3.36 mmol), diphenyliodonium hexafluorophosphate (2.15 g, 5.04 mmol), potassium carbonate (928.77 mg, 6.72 mmol) and cuprous iodide (127.60 mg, 0.67 mmol) were placed in a 100 mL round bottom flask under nitrogen. Then 30 mL N,N-dimethylformamide was injected into the bottle. Then the reaction mixture was refluxed in a nitrogen atmosphere at 80 °C for 24 hours. As the reaction cooled to room temperature, evaporated this reaction solution under reduced pressure. Then, the mixture was poured into the water and extracted with dichloromethane three times. Finally, the extract dried over anhydrous MgSO<sub>4</sub> and evaporated under reduced pressure to obtain the crude product, which was purified by silica gel column chromatography. The white solid of PADP was obtained in 80% yield. <sup>1</sup>H NMR (500 MHz, CD<sub>2</sub>Cl<sub>2</sub>) δ 8.49 (d, J = 7.9 Hz, 1H), 7.63 – 7.58 (m, 1H), 7.54 (t, J = 7.5 Hz, 1H), 7.26 – 7.20 (m, 5H), 7.19 – 7.14 (m, 4H), 7.14 – 7.11 (m, 2H), 6.97 – 6.89 (m, 5H). <sup>13</sup>C NMR (126 MHz, CD<sub>2</sub>Cl<sub>2</sub>) δ 141.60, 140.34, 138.34, 137.05, 135.54, 132.99, 132.29, 131.71, 130.35, 129.03, 128.50, 128.35, 127.99, 127.70, 127.59, 127.37, 126.19. HRMS (C<sub>27</sub>H<sub>20</sub>NO): m/z [M + H<sup>+</sup>] calcd 374.1540; found: 374.1539.

**6-bromo-3,4-diphenyl-1H-isochromen-1-one (PADA-Br):** 4-Bromobenzoic acid (1.0 g, 4.98 mmol, Cat No.1036740, Leyan, Shanghai, China), 1,2-diphenylethyne (1.07 g, 5.98 mmol), bis [(pentamethylcyclopentadienyl)dichloro-rhodium] (154.52 mg, 0.25 mmol) and silver carbonate (2.75 g, 9.96 mmol) were placed in a 250 mL round bottom flask under nitrogen. Then 60 mL of acetonitrile was injected into the bottle, and the reaction mixture was refluxed

in a nitrogen atmosphere at 80 °C for 24 hours. After the reaction finished, cooling to room temperature. Then, the mixture was poured into the water solution and extracted with dichloromethane three times. Finally, the extract dried over anhydrous MgSO<sub>4</sub> and evaporated under reduced pressure to obtain the crude product, which was purified by silica gel column chromatograph. The white powder of PADA-Br was obtained in 84% yield. <sup>1</sup>H NMR (500 MHz, CD<sub>2</sub>Cl<sub>2</sub>) δ 8.21 (d, J = 8.4 Hz, 1H), 7.66 (dd, J = 8.4, 1.8 Hz, 1H), 7.47 – 7.41 (m, 3H), 7.34 – 7.30 (m, 3H), 7.29 – 7.24 (m, 3H), 7.24 – 7.20 (m, 2H). <sup>13</sup>C NMR (126 MHz, CD<sub>2</sub>Cl<sub>2</sub>) δ 161.90, 152.81, 141.00, 134.18, 133.40, 131.98, 131.73, 131.55, 130.81, 129.78, 129.74, 128.94, 128.62, 128.48, 119.78, 116.60.

**6-bromo-3,4-diphenylisoquinolin-1(2H)-one (PADH-Br):** PADA-Br (1 g, 2.65 mmol) and ammonium acetate (1.63 g, 21.20 mmol) were dissolved in dimethyl sulfoxide (15 mL) under a nitrogen atmosphere. Then the reaction mixture was stirred and refluxed in a nitrogen atmosphere at 110 °C for 12 hours. As the reaction solution cooled to room temperature, added a certain amount of deionized water to the reaction solution. Upon the addition of water, a white solid precipitated out, which can be obtained as PADH-Br through suction filtration. The white solid of PADH-Br was obtained in 92% yield. <sup>1</sup>H NMR (500 MHz, CD<sub>2</sub>Cl<sub>2</sub>) δ 9.32 (s, 1H), 8.27 (d, J = 8.5 Hz, 1H), 7.61 (dd, J = 8.5, 1.9 Hz, 1H), 7.46 (d, J = 1.9 Hz, 1H), 7.37 – 7.24 (m, 8H), 7.20 – 7.16 (m, 2H). <sup>13</sup>C NMR (126 MHz, CD<sub>2</sub>Cl<sub>2</sub>) δ 162.34, 140.91, 139.26, 135.61, 135.37, 132.30, 130.41, 129.80, 129.66, 129.45, 129.11, 128.92, 128.71, 128.64, 128.17, 124.33, 116.85.

**6-bromo-2,3,4-triphenylisoquinolin-1(2H)-one (PADP-Br):** PADH-Br (1 g, 2.66 mmol), diphenyliodonium hexafluorophosphate (1.70 g, 3.99 mmol), potassium carbonate (735.28 mg, 5.32 mmol) and cuprous iodide (100.91 mg, 0.53 mmol) were placed in a 100 mL round bottom flask under nitrogen. Then 25 mL N,N-dimethylformamide was injected into the bottle. Then the reaction mixture was refluxed in a nitrogen atmosphere at 80 °C for 24 hours. As the reaction cooled to room temperature, evaporated this reaction solution under reduced pressure. Then, the mixture was poured into the water and extracted with dichloromethane three times. Finally, the extract dried over anhydrous MgSO<sub>4</sub> and evaporated under reduced pressure to obtain the crude product, which was purified by silica gel column chromatography. The white solid of PADP-Br was obtained in 84% yield. <sup>1</sup>H NMR (400 MHz, CD<sub>2</sub>Cl<sub>2</sub>) δ 8.36 (d, J = 8.5 Hz, 1H), 7.63 (dd, J = 8.6, 1.9 Hz, 1H), 7.39 – 7.32 (m, 1H), 7.26 – 7.08 (m, 10H), 6.92 (s, 5H). <sup>13</sup>C

NMR (126 MHz, CD<sub>2</sub>Cl<sub>2</sub>) δ 143.10, 140.03, 139.91, 136.29, 135.22, 132.19, 131.53, 130.64, 130.35, 130.22, 129.11, 128.72, 128.64, 128.30, 128.17, 127.88, 127.67.

**6-(4-(9H-carbazol-9-yl)phenyl)-2,3,4-triphenylisoquinolin-1(2H)-one (PADP-pCz):** A mixture of compound PADP-Br (1 g, 2.21 mmol), 4-(9H-Carbazol-9-yl)phenylboronic acid (953.24 mg, 3.32 mmol), tetrakis(triphenylphosphine)palladium (150.22 mg, 0.13 mmol), and potassium carbonate (2 M) added in 250 mL round bottom flask under nitrogen. Then, a mixed solvent system of toluene, C<sub>2</sub>H<sub>5</sub>OH and H<sub>2</sub>O (v/v/v = 8:1:1) was injected into the bottle, and the reaction mixture was refluxed for 24 hours. After cooling to room temperature, the mixture was poured into water and extracted three times with dichloromethane, and then dried over anhydrous MgSO<sub>4</sub>. After filtration, the solvent was evaporated under reduced pressure and the residue was purified by silica gel column chromatography. The white solid of PADP-pCz was obtained in 82% yield. <sup>1</sup>H NMR (400 MHz, CD<sub>2</sub>Cl<sub>2</sub>) δ 8.63 (d, J = 8.3 Hz, 1H), 8.16 (d, J = 7.7 Hz, 2H), 7.89 (dd, J = 8.3, 1.8 Hz, 1H), 7.82 – 7.75 (m, 2H), 7.66 – 7.61 (m, 2H), 7.54 (d, J = 1.8 Hz, 1H), 7.47 – 7.39 (m, 4H), 7.32 – 7.23 (m, 8H), 7.22 – 7.14 (m, 4H), 7.00 – 6.92 (m, 5H). <sup>13</sup>C NMR (101 MHz, CD<sub>2</sub>Cl<sub>2</sub>) δ 162.82, 144.74, 142.34, 141.27, 140.37, 139.81, 138.90, 138.17, 137.00, 135.52, 132.31, 131.72, 130.33, 129.40, 129.35, 129.07, 128.64, 128.06, 127.85, 127.76, 127.65, 127.51, 126.57, 126.40, 125.30, 124.41, 123.96, 120.80, 120.62, 119.25, 110.31. HRMS (C<sub>45</sub>H<sub>30</sub>N<sub>2</sub>NaO): m/z [M + Na<sup>+</sup>] calcd 637.2251; found: 637.2250.

**6-(3-(9H-carbazol-9-yl)phenyl)-2,3,4-triphenylisoquinolin-1(2H)-one (PADP-mCz):** A mixture of compound PADP-Br (1 g, 2.21 mmol), 3-(9H-Carbazol-9-yl)phenylboronic acid (953.24 mg, 3.32 mmol), tetrakis(triphenylphosphine)palladium (150.22 mg, 0.13 mmol), and potassium carbonate (2 M) added in 250 mL round bottom flask under nitrogen. Then, a mixed solvent system of toluene, C<sub>2</sub>H<sub>5</sub>OH and H<sub>2</sub>O (v/v/v = 8:1:1) was injected into the bottle, and the reaction mixture was refluxed for 24 hours. After cooling to room temperature, the mixture was poured into water and extracted three times with dichloromethane, and then dried over anhydrous MgSO<sub>4</sub>. After filtration, the solvent was evaporated under reduced pressure and the residue was purified by silica gel column chromatography. The white solid of PADP-mCz was obtained in 78% yield. <sup>1</sup>H NMR (400 MHz, CD<sub>2</sub>Cl<sub>2</sub>) δ 8.59 (d, J = 8.3 Hz, 1H), 8.16 (dt, J = 7.9, 1.0 Hz, 2H), 7.83 (dd, J = 8.4, 1.8 Hz, 1H), 7.75 (t, J = 1.9 Hz, 1H), 7.70 – 7.57 (m, 3H), 7.50 (d, J = 1.8 Hz, 1H), 7.43 – 7.37 (m, 4H), 7.32 – 7.28 (m, 2H), 7.27 – 7.13 (m, 10H), 6.98 – 6.91 (m, 5H). <sup>13</sup>C NMR (101 MHz, CD<sub>2</sub>Cl<sub>2</sub>) δ 162.77, 144.83, 142.96, 142.31, 141.19, 140.33, 138.88, 138.83, 136.88, 136.86, 135.49, 135.48, 132.25, 131.70, 131.00, 130.31, 129.33,

129.07, 129.06, 128.63, 128.05, 127.76, 127.64, 127.54, 126.85, 126.65, 126.46, 126.30, 125.42, 124.75, 123.93, 120.79, 120.62, 119.22, 110.23. HRMS ( $C_{45}H_{30}N_2NaO$ ):  $m/z$  [ $M + Na^+$ ] calcd 637.2251; found: 637.2250.

**6-(4-(diphenylamino)phenyl)-2,3,4-triphenylisoquinolin-1(2H)-one (PADP-TPA):** A mixture of compound PADP-Br (1 g, 2.21 mmol), 4-(Diphenylamino)phenylboronic acid (959.95 mg, 3.32 mmol), tetrakis(triphenylphosphine)palladium (150.22 mg, 0.13 mmol), and potassium carbonate (2 M) added in 250 mL round bottom flask under nitrogen. Then, a mixed solvent system of toluene,  $C_2H_5OH$  and  $H_2O$  (v/v/v = 8:1:1) was injected into the bottle, and the reaction mixture was refluxed for 24 hours. After cooling to room temperature, the mixture was poured into water and extracted three times with dichloromethane, and then dried over anhydrous  $MgSO_4$ . After filtration, the solvent was evaporated under reduced pressure and the residue was purified by silica gel column chromatography. The white solid of PADP-TPA was obtained in 88% yield.  $^1H$  NMR (500 MHz,  $CD_2Cl_2$ )  $\delta$  8.52 (d,  $J = 8.3$  Hz, 1H), 7.76 (dd,  $J = 8.3, 1.8$  Hz, 1H), 7.43 – 7.40 (m, 2H), 7.38 (d,  $J = 1.8$  Hz, 1H), 7.29 – 7.25 (m, 4H), 7.25 – 7.12 (m, 10H), 7.11 – 7.08 (m, 4H), 7.07 – 7.04 (m, 4H), 6.97 – 6.91 (m, 5H).  $^{13}C$  NMR (126 MHz,  $CD_2Cl_2$ )  $\delta$  162.86, 148.65, 147.98, 145.06, 142.04, 140.42, 138.81, 137.07, 135.59, 134.04, 132.28, 131.72, 130.35, 129.89, 129.08, 129.02, 128.54, 127.98, 127.69, 127.60, 127.42, 125.94, 125.29, 124.59, 123.88, 123.74, 123.52, 119.29. HRMS ( $C_{45}H_{32}N_2NaO$ ):  $m/z$  [ $M + Na^+$ ] calcd 639.2407; found: 639.2407.

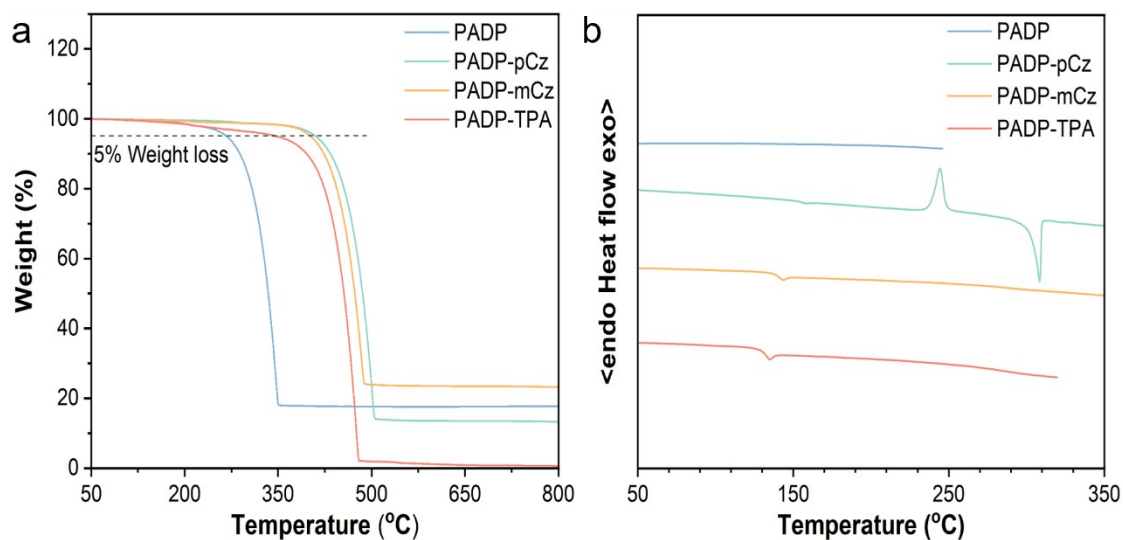

**Figure S1.** (a) Thermogravimetric analysis and (b) differential scanning calorimetry curve of **PADP**, **PADP-pCz**, **PADP-mCz**, and **PADP-TPA**.

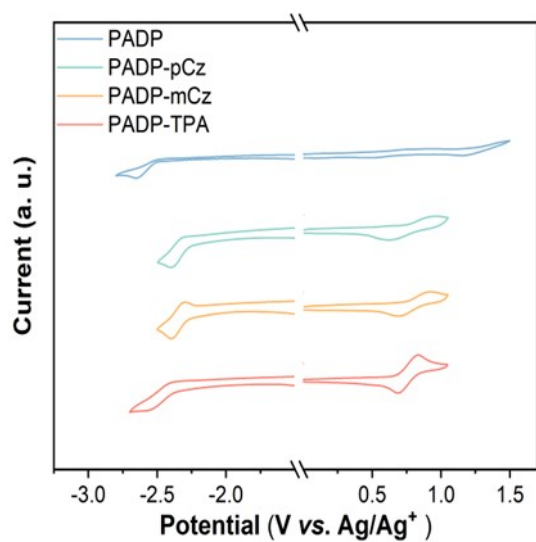

**Figure S2.** Cyclic voltammogram of **PADP**, **PADP-pCz**, **PADP-mCz**, and **PADP-TPA**.

### S-3 X-ray Crystallography

The crystals of **PADP**, **PADP-pCz**, and **PADP-mCz** were grown from a tetrahydrofuran/methyl alcohol system via slow solvent evaporation. CCDC 2526442, 2526443, and 2526444 contain the supplementary crystallographic data for this paper.

**Table S1.** Crystal data and structure refinement for **PADP**.

|                                             |                                                               |
|---------------------------------------------|---------------------------------------------------------------|
| Identification code                         | PADP                                                          |
| Empirical formula                           | C <sub>27.5</sub> H <sub>20</sub> ClNO                        |
| Formula weight                              | 415.89                                                        |
| Temperature/K                               | 100.00(10)                                                    |
| Crystal system                              | monoclinic                                                    |
| Space group                                 | P2 <sub>1</sub> /n                                            |
| a/Å                                         | 10.1296(2)                                                    |
| b/Å                                         | 19.0519(3)                                                    |
| c/Å                                         | 22.3359(5)                                                    |
| α/°                                         | 90                                                            |
| β/°                                         | 101.440(2)                                                    |
| γ/°                                         | 90                                                            |
| Volume/Å <sup>3</sup>                       | 4224.92(16)                                                   |
| Z                                           | 8                                                             |
| ρ <sub>calc</sub> /cm <sup>3</sup>          | 1.308                                                         |
| μ/mm <sup>-1</sup>                          | 1.742                                                         |
| F(000)                                      | 1736.0                                                        |
| Crystal size/mm <sup>3</sup>                | 0.14 × 0.12 × 0.1                                             |
| Radiation                                   | Cu Kα (λ = 1.54184)                                           |
| 2Θ range for data collection/°              | 8.078 to 133.198                                              |
| Index ranges                                | -9 ≤ h ≤ 11, -22 ≤ k ≤ 22, -26 ≤ l ≤ 26                       |
| Reflections collected                       | 49801                                                         |
| Independent reflections                     | 7359 [R <sub>int</sub> = 0.0504, R <sub>sigma</sub> = 0.0296] |
| Data/restraints/parameters                  | 7359/0/550                                                    |
| Goodness-of-fit on F <sup>2</sup>           | 1.168                                                         |
| Final R indexes [I >= 2σ (I)]               | R <sub>1</sub> = 0.1053, wR <sub>2</sub> = 0.2639             |
| Final R indexes [all data]                  | R <sub>1</sub> = 0.1133, wR <sub>2</sub> = 0.2680             |
| Largest diff. peak/hole / e Å <sup>-3</sup> | 0.48/-0.81                                                    |

**Table S2.** Crystal data and structure refinement for **PADP-pCz**.

|                                             |                                                                |
|---------------------------------------------|----------------------------------------------------------------|
| Identification code                         | PADP-pCz                                                       |
| Empirical formula                           | C <sub>45</sub> H <sub>30</sub> N <sub>2</sub> O               |
| Formula weight                              | 614.71                                                         |
| Temperature/K                               | 102(3)                                                         |
| Crystal system                              | triclinic                                                      |
| Space group                                 | P-1                                                            |
| a/Å                                         | 9.8050(6)                                                      |
| b/Å                                         | 18.3387(11)                                                    |
| c/Å                                         | 20.2686(11)                                                    |
| α/°                                         | 63.146(6)                                                      |
| β/°                                         | 80.571(5)                                                      |
| γ/°                                         | 83.606(6)                                                      |
| Volume/Å <sup>3</sup>                       | 3204.7(4)                                                      |
| Z                                           | 4                                                              |
| ρ <sub>calc</sub> /g/cm <sup>3</sup>        | 1.274                                                          |
| μ/mm <sup>-1</sup>                          | 0.589                                                          |
| F(000)                                      | 1288.0                                                         |
| Crystal size/mm <sup>3</sup>                | 0.16 × 0.1 × 0.08                                              |
| Radiation                                   | Cu Kα (λ = 1.54184)                                            |
| 2Θ range for data collection/°              | 8.784 to 133.198                                               |
| Index ranges                                | -11 ≤ h ≤ 11, -18 ≤ k ≤ 21, -24 ≤ l ≤ 24                       |
| Reflections collected                       | 44643                                                          |
| Independent reflections                     | 10911 [R <sub>int</sub> = 0.0999, R <sub>sigma</sub> = 0.1042] |
| Data/restraints/parameters                  | 10911/840/865                                                  |
| Goodness-of-fit on F <sup>2</sup>           | 1.303                                                          |
| Final R indexes [I >= 2σ (I)]               | R <sub>1</sub> = 0.1796, wR <sub>2</sub> = 0.3447              |
| Final R indexes [all data]                  | R <sub>1</sub> = 0.2111, wR <sub>2</sub> = 0.3608              |
| Largest diff. peak/hole / e Å <sup>-3</sup> | 0.50/-0.59                                                     |

**Table S3.** Crystal data and structure refinement for **PADP-mCz**.

|                                             |                                                               |
|---------------------------------------------|---------------------------------------------------------------|
| Identification code                         | PADP-mCz                                                      |
| Empirical formula                           | C <sub>45</sub> H <sub>30</sub> N <sub>2</sub> O              |
| Formula weight                              | 614.71                                                        |
| Temperature/K                               | 120.00(10)                                                    |
| Crystal system                              | monoclinic                                                    |
| Space group                                 | C2/c                                                          |
| a/Å                                         | 11.91870(10)                                                  |
| b/Å                                         | 19.0723(2)                                                    |
| c/Å                                         | 29.5542(3)                                                    |
| α/°                                         | 90                                                            |
| β/°                                         | 91.6540(10)                                                   |
| γ/°                                         | 90                                                            |
| Volume/Å <sup>3</sup>                       | 6715.37(11)                                                   |
| Z                                           | 8                                                             |
| ρ <sub>calc</sub> /g/cm <sup>3</sup>        | 1.216                                                         |
| μ/mm <sup>-1</sup>                          | 0.562                                                         |
| F(000)                                      | 2576.0                                                        |
| Crystal size/mm <sup>3</sup>                | 0.15 × 0.12 × 0.1                                             |
| Radiation                                   | Cu Kα (λ = 1.54184)                                           |
| 2θ range for data collection/°              | 5.984 to 149.958                                              |
| Index ranges                                | -14 ≤ h ≤ 13, -22 ≤ k ≤ 23, -35 ≤ l ≤ 36                      |
| Reflections collected                       | 20614                                                         |
| Independent reflections                     | 6574 [R <sub>int</sub> = 0.0194, R <sub>sigma</sub> = 0.0174] |
| Data/restraints/parameters                  | 6574/0/433                                                    |
| Goodness-of-fit on F <sup>2</sup>           | 1.014                                                         |
| Final R indexes [I >= 2σ (I)]               | R <sub>1</sub> = 0.0391, wR <sub>2</sub> = 0.1078             |
| Final R indexes [all data]                  | R <sub>1</sub> = 0.0410, wR <sub>2</sub> = 0.1097             |
| Largest diff. peak/hole / e Å <sup>-3</sup> | 0.20/-0.24                                                    |

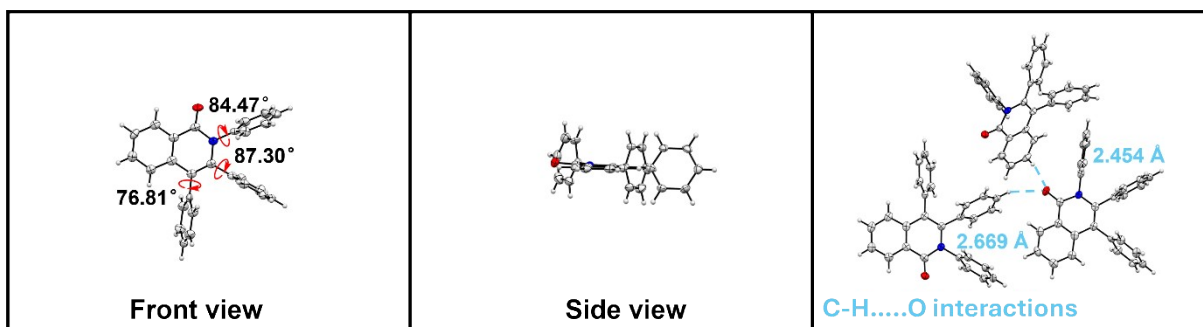

**Figure S3.** The front view, side view and hydrogen bond structure of the **PADD** crystal.

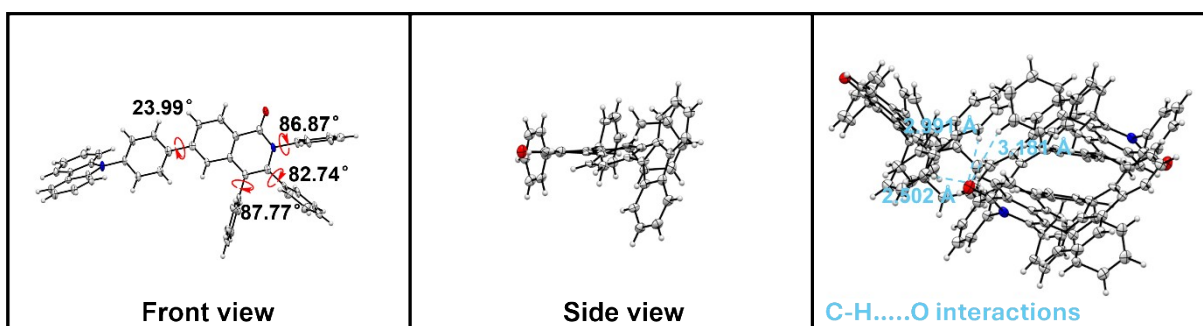

**Figure S4.** The front view, side view and hydrogen bond structure of the **PADD-pCz** crystal.

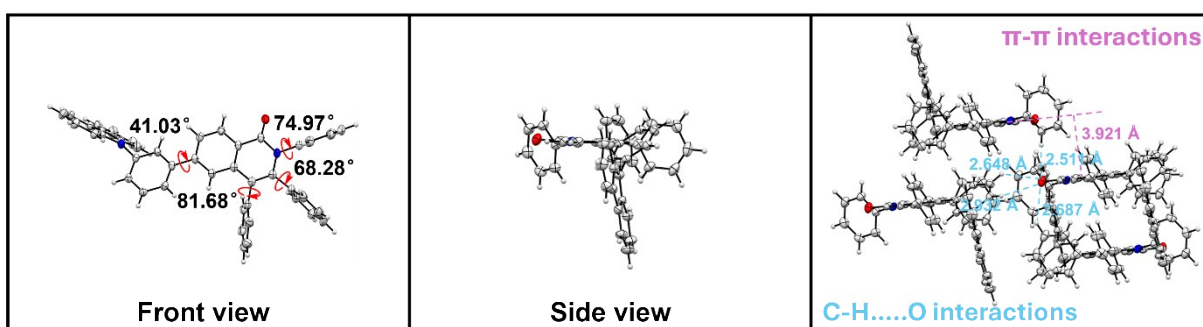

**Figure S5.** The front view, side view, hydrogen bonds and packing structure of the **PADD-mCz** crystal.

## S-4 Computational Methods

All density functional theory (DFT) and time-dependent DFT (TD-DFT) calculations were carried out using Gaussian 16 package. The optimized structure in the gas were calculated by DFT method at the B3LYP/6-31G (d, p) level. The  $S_1$  geometry was optimized by time-dependent DFT (TD-DFT) at the TD-M062X/6-31G (d, p) level. For better understanding of the excited-state properties, natural transition orbitals (NTO) and energy levels of the first ten singlet and triplet states were performed on the basis of  $S_1$  geometry at the same level. To reduce computational costs within the ORCA software package, the spin-orbit mean-field (SOMF) method was combined with the RIJCOSX method to calculate SOC values. The functional and basis set employed were consistent with those used in the TD-DFT calculations.

**Table S4.** Cartesian coordinates for the optimized structure of ground-state ( $S_0$ ) geometry of **PADP**.

| Atom | x           | y           | z           |
|------|-------------|-------------|-------------|
| N    | 1.0481348   | 1.02180447  | 0.03551416  |
| C    | 0.70853855  | 2.39397511  | 0.05869163  |
| C    | -0.73011549 | 2.6875343   | 0.04161761  |
| C    | -1.69296067 | 1.6525391   | 0.00310914  |
| C    | -1.24751419 | 0.26806851  | -0.0057798  |
| C    | 0.09471925  | -0.00956405 | 0.0189892   |
| O    | 1.58169394  | 3.25486637  | 0.0780893   |
| C    | 0.61060623  | -1.41231758 | 0.0632234   |
| C    | -2.26619527 | -0.82854054 | 0.01000917  |
| C    | -3.04799081 | -1.09127117 | -1.12619556 |
| C    | -4.01396964 | -2.09771938 | -1.11311323 |
| C    | -4.21790622 | -2.85804726 | 0.03956679  |
| C    | -3.4522703  | -2.60234624 | 1.1778941   |
| C    | -2.48863468 | -1.59385147 | 1.16378042  |
| C    | 1.27423128  | -1.89433933 | 1.2012258   |
| C    | 1.72882844  | -3.21068359 | 1.251855    |
| C    | 1.53198738  | -4.06365802 | 0.16434588  |
| C    | 0.87388048  | -3.5930744  | -0.97218734 |
| C    | 0.4146026   | -2.2772924  | -1.02169097 |
| C    | -1.12327925 | 4.03601435  | 0.06247648  |
| C    | -2.46639804 | 4.3732347   | 0.05445208  |
| C    | -3.43321938 | 3.35487208  | 0.0313603   |
| C    | -3.05813509 | 2.02086587  | 0.00837559  |
| C    | 2.46155748  | 0.73493793  | -0.08292669 |
| C    | 2.97508317  | 0.25859463  | -1.2891063  |
| C    | 4.33951523  | -0.00847156 | -1.40335328 |
| C    | 5.19055538  | 0.21544422  | -0.32094386 |
| C    | 4.67379163  | 0.71100263  | 0.87790078  |
| C    | 3.31044483  | 0.97298257  | 0.99888411  |

|   |             |             |             |
|---|-------------|-------------|-------------|
| H | -2.89169106 | -0.50219196 | -2.02571569 |
| H | -4.60495309 | -2.28911291 | -2.00430312 |
| H | -4.96880117 | -3.64265789 | 0.05074013  |
| H | -3.60637769 | -3.18672286 | 2.080485    |
| H | -1.89660104 | -1.39710196 | 2.05218059  |
| H | 1.43111532  | -1.23531412 | 2.0492484   |
| H | 2.23654168  | -3.57028425 | 2.14200539  |
| H | 1.8883304   | -5.0887751  | 0.20377336  |
| H | 0.71548538  | -4.2501141  | -1.82226731 |
| H | -0.10388421 | -1.91603923 | -1.90379829 |
| H | -0.34314368 | 4.78876368  | 0.08737342  |
| H | -2.77045513 | 5.41530918  | 0.07095226  |
| H | -4.48880756 | 3.61198017  | 0.03451302  |
| H | -3.81690088 | 1.24742368  | -0.00194577 |
| H | 2.30804283  | 0.09701721  | -2.1292042  |
| H | 4.73583914  | -0.38581854 | -2.34117232 |
| H | 6.25300248  | 0.01045531  | -0.41225874 |
| H | 5.33307768  | 0.89757066  | 1.72025359  |
| H | 2.90116811  | 1.37071683  | 1.92106405  |

---

**Table S5.** Cartesian coordinates for the optimized structure of ground-state ( $S_0$ ) geometry of**PADP-pCz.**

| Atom | x           | y           | z           |
|------|-------------|-------------|-------------|
| N    | 4.60522986  | -1.27990253 | -0.1139391  |
| C    | 3.70170206  | -2.36412907 | -0.20506327 |
| C    | 2.28085854  | -2.00269129 | -0.15678152 |
| C    | 1.86299305  | -0.65950154 | -0.02252841 |
| C    | 2.86636115  | 0.39059608  | 0.05494406  |
| C    | 4.19535797  | 0.05844554  | -0.00088143 |
| O    | 4.11149948  | -3.51554555 | -0.30528201 |
| C    | 5.26958794  | 1.09835886  | 0.02290012  |
| C    | 2.42569186  | 1.81799495  | 0.14813429  |
| C    | 2.53936658  | 2.68490954  | -0.94799576 |
| C    | 2.10813789  | 4.0087198   | -0.85983764 |
| C    | 1.54714118  | 4.48723871  | 0.32486505  |
| C    | 1.41929862  | 3.63281928  | 1.42133411  |
| C    | 1.85302445  | 2.30989589  | 1.33205018  |
| C    | 5.47927655  | 1.87895453  | 1.16754575  |
| C    | 6.46489596  | 2.86536306  | 1.18260299  |
| C    | 7.25149291  | 3.0877621   | 0.05208206  |
| C    | 7.04748619  | 2.31774952  | -1.09440036 |
| C    | 6.06592446  | 1.32863892  | -1.1086523  |
| C    | 1.33228998  | -3.03417711 | -0.2456531  |
| C    | -0.02008049 | -2.75101083 | -0.21346488 |
| C    | -0.46898956 | -1.41493998 | -0.09998039 |
| C    | 0.47718354  | -0.39358199 | -0.01012352 |
| C    | 6.00396564  | -1.64313479 | -0.03578949 |
| C    | 6.68539242  | -1.5272057  | 1.1756541   |
| C    | 8.03118092  | -1.88689925 | 1.24987363  |
| C    | 8.68913694  | -2.37623414 | 0.12128829  |
| C    | 7.99641487  | -2.50841918 | -1.08389355 |
| C    | 6.65371164  | -2.14418122 | -1.16461439 |
| C    | -1.92006901 | -1.10386242 | -0.08118087 |
| C    | -2.82973121 | -1.83966013 | -0.8595038  |
| C    | -4.18948881 | -1.54417151 | -0.85584672 |
| C    | -4.68344263 | -0.50975539 | -0.05120329 |
| C    | -3.79122152 | 0.22631917  | 0.73879198  |
| C    | -2.43079686 | -0.06372939 | 0.7138667   |
| N    | -6.07022593 | -0.21092866 | -0.03613129 |
| C    | -6.64058285 | 1.04547998  | -0.27720387 |
| C    | -7.10277563 | -1.12134659 | 0.22284942  |
| C    | -6.02130863 | 2.25265167  | -0.61296121 |
| C    | -6.83637817 | 3.36270574  | -0.8231848  |
| C    | -8.23437599 | 3.27823988  | -0.70902801 |
| C    | -8.84622305 | 2.07017416  | -0.38857469 |
| C    | -8.05087171 | 0.93889627  | -0.17274958 |
| C    | -8.34540505 | -0.44210363 | 0.1478567   |
| C    | -9.53180218 | -1.14554762 | 0.38580592  |
| C    | -9.46606307 | -2.49981263 | 0.69893328  |

|   |              |             |             |
|---|--------------|-------------|-------------|
| C | -8.22529208  | -3.15391872 | 0.78384805  |
| C | -7.02963201  | -2.47792841 | 0.55113119  |
| H | 2.97347841   | 2.31642474  | -1.87225018 |
| H | 2.20856106   | 4.6656087   | -1.71903915 |
| H | 1.2110288    | 5.51770376  | 0.39325985  |
| H | 0.98510391   | 3.99656952  | 2.34832495  |
| H | 1.75425002   | 1.6482178   | 2.18833412  |
| H | 4.86372165   | 1.71311392  | 2.0456346   |
| H | 6.61618043   | 3.46058163  | 2.07826279  |
| H | 8.01798191   | 3.85699801  | 0.0630576   |
| H | 7.65277791   | 2.48730329  | -1.97999081 |
| H | 5.9125246    | 0.73210212  | -2.00233394 |
| H | 1.6977593    | -4.05148897 | -0.33193474 |
| H | -0.74287618  | -3.5595622  | -0.25236612 |
| H | 0.14338149   | 0.63564321  | 0.03991057  |
| H | 6.16349564   | -1.1555975  | 2.05105983  |
| H | 8.56157565   | -1.789387   | 2.19225791  |
| H | 9.7357844    | -2.65913534 | 0.18130478  |
| H | 8.50048113   | -2.89891741 | -1.96275923 |
| H | 6.10306403   | -2.25535338 | -2.09230136 |
| H | -2.46295467  | -2.62835813 | -1.50885199 |
| H | -4.87203022  | -2.09876404 | -1.49102368 |
| H | -4.17229181  | 1.00980177  | 1.3851803   |
| H | -1.75763854  | 0.50201034  | 1.35014654  |
| H | -4.94412418  | 2.32442431  | -0.71345074 |
| H | -6.37800029  | 4.31213352  | -1.08393126 |
| H | -8.84044735  | 4.16304512  | -0.87744616 |
| H | -9.92767783  | 2.00328657  | -0.31120331 |
| H | -10.49077788 | -0.63823505 | 0.33095395  |
| H | -10.3793748  | -3.056654   | 0.88421331  |
| H | -8.193917    | -4.20905514 | 1.03913783  |
| H | -6.07611964  | -2.98810428 | 0.62902654  |

---

**Table S6.** Cartesian coordinates for the optimized structure of ground-state ( $S_0$ ) geometry of**PADP-mCz.**

| Atom | x           | y           | z           |
|------|-------------|-------------|-------------|
| N    | 3.97725717  | -1.44696884 | -0.11591226 |
| C    | 2.82934027  | -2.25425188 | 0.05850597  |
| C    | 1.58314028  | -1.52520654 | 0.3192966   |
| C    | 1.55337734  | -0.11456012 | 0.39540439  |
| C    | 2.7849837   | 0.63252965  | 0.19473831  |
| C    | 3.94949605  | -0.04410308 | -0.0616976  |
| O    | 2.90721202  | -3.47656168 | 0.00074683  |
| C    | 5.23524396  | 0.67174482  | -0.32707174 |
| C    | 2.74682706  | 2.12848829  | 0.22662456  |
| C    | 2.8582984   | 2.88174058  | -0.95070767 |
| C    | 2.80197768  | 4.27520922  | -0.91549711 |
| C    | 2.62449308  | 4.94049978  | 0.29821813  |
| C    | 2.50279249  | 4.20303767  | 1.47717309  |
| C    | 2.56151789  | 2.80969158  | 1.44034651  |
| C    | 5.85578934  | 1.41842181  | 0.68331678  |
| C    | 7.04214859  | 2.1062263   | 0.43001737  |
| C    | 7.6219972   | 2.06047608  | -0.83803555 |
| C    | 7.00914243  | 1.32235963  | -1.85221214 |
| C    | 5.82613187  | 0.63085422  | -1.59859295 |
| C    | 0.40583285  | -2.269591   | 0.4956368   |
| C    | -0.79813999 | -1.63488184 | 0.73646196  |
| C    | -0.86236558 | -0.22419071 | 0.80063798  |
| C    | 0.30969522  | 0.5114554   | 0.62582446  |
| C    | 5.22595373  | -2.16600156 | -0.25178531 |
| C    | 6.13623201  | -2.18361262 | 0.80483027  |
| C    | 7.33465052  | -2.885532   | 0.67408363  |
| C    | 7.61486289  | -3.5809213  | -0.50235863 |
| C    | 6.69096249  | -3.57561137 | -1.54933709 |
| C    | 5.49531951  | -2.87045322 | -1.42591295 |
| C    | -2.21838883 | 1.63780438  | 1.81597768  |
| C    | -3.43473589 | 2.28174933  | 2.03242461  |
| C    | -4.61545244 | 1.76685569  | 1.49961611  |
| C    | -4.56867489 | 0.60218146  | 0.72429184  |
| C    | -3.34627477 | -0.03771929 | 0.49690228  |
| C    | -2.15630425 | 0.46429345  | 1.04576412  |
| N    | -5.76045732 | 0.07338086  | 0.15942519  |
| C    | -6.24787227 | -1.22594438 | 0.34365423  |
| C    | -6.64489697 | 0.76184479  | -0.67940026 |
| C    | -5.73178792 | -2.26590128 | 1.12170771  |
| C    | -6.43521594 | -3.46804142 | 1.14591877  |
| C    | -7.62673546 | -3.63480618 | 0.41971935  |
| C    | -8.14322483 | -2.59108654 | -0.34204973 |
| C    | -7.45678595 | -1.37192426 | -0.38350866 |
| C    | -7.70904522 | -0.10481009 | -1.03739779 |
| C    | -8.71920003 | 0.35888381  | -1.88815395 |
| C    | -8.65396555 | 1.66234791  | -2.37106316 |

|   |             |             |             |
|---|-------------|-------------|-------------|
| C | -7.58504211 | 2.50307184  | -2.01685264 |
| C | -6.56695144 | 2.06755462  | -1.17161322 |
| H | 2.99442615  | 2.36820686  | -1.89738422 |
| H | 2.89425017  | 4.84086001  | -1.8381689  |
| H | 2.580151    | 6.02530725  | 0.32543305  |
| H | 2.36580031  | 4.71209351  | 2.42705155  |
| H | 2.46902016  | 2.23880467  | 2.36031766  |
| H | 5.4027309   | 1.46186485  | 1.66836247  |
| H | 7.51167105  | 2.67892833  | 1.22433659  |
| H | 8.54495218  | 2.59744144  | -1.03595299 |
| H | 7.45187926  | 1.28491867  | -2.84315517 |
| H | 5.35459472  | 0.05760809  | -2.3904932  |
| H | 0.47751958  | -3.35029916 | 0.44259607  |
| H | -1.69620109 | -2.2226336  | 0.8969537   |
| H | 0.26350877  | 1.59355896  | 0.63630219  |
| H | 5.90587628  | -1.64885336 | 1.72014586  |
| H | 8.04499673  | -2.89230921 | 1.49523032  |
| H | 8.54655056  | -4.12977543 | -0.6014487  |
| H | 6.89889549  | -4.12400617 | -2.46311277 |
| H | 4.76515018  | -2.8708608  | -2.22783014 |
| H | -1.31250784 | 2.03196914  | 2.26473586  |
| H | -3.46794792 | 3.18072971  | 2.64057478  |
| H | -5.56900215 | 2.2485689   | 1.68717129  |
| H | -3.32412052 | -0.91348725 | -0.1423661  |
| H | -4.81930303 | -2.14092531 | 1.69413717  |
| H | -6.05325405 | -4.29148018 | 1.74217481  |
| H | -8.14922835 | -4.58561021 | 0.45842658  |
| H | -9.06971572 | -2.71807584 | -0.89478783 |
| H | -9.54088255 | -0.29314779 | -2.17050288 |
| H | -9.43209614 | 2.03376109  | -3.03071952 |
| H | -7.54733305 | 3.51425669  | -2.41134162 |
| H | -5.74055581 | 2.71916575  | -0.91032314 |

---

**Table S7.** Cartesian coordinates for the optimized structure of ground-state ( $S_0$ ) geometry of**PADP-TPA.**

| Atom | x           | y           | z           |
|------|-------------|-------------|-------------|
| N    | 4.55970928  | -1.2384986  | -0.23918964 |
| C    | 3.65542974  | -2.30107167 | -0.47410171 |
| C    | 2.23571332  | -1.94050225 | -0.41787366 |
| C    | 1.81662574  | -0.61747785 | -0.15062367 |
| C    | 2.82066658  | 0.40768787  | 0.09036467  |
| C    | 4.14953031  | 0.07363633  | 0.04874215  |
| O    | 4.0666907   | -3.43088434 | -0.71706615 |
| C    | 5.22386576  | 1.07249854  | 0.33895915  |
| C    | 2.38055515  | 1.79866692  | 0.42463179  |
| C    | 2.49602308  | 2.30262467  | 1.72796488  |
| C    | 2.06599206  | 3.59352304  | 2.03595469  |
| C    | 1.50417062  | 4.40145063  | 1.04664641  |
| C    | 1.3743011   | 3.90955912  | -0.25326847 |
| C    | 1.80701265  | 2.61926481  | -0.5598723  |
| C    | 6.02008374  | 0.95176755  | 1.48753092  |
| C    | 7.00217396  | 1.898762    | 1.77160015  |
| C    | 7.20700963  | 2.97786462  | 0.90987718  |
| C    | 6.4206244   | 3.10602119  | -0.23531953 |
| C    | 5.43470914  | 2.16111115  | -0.51783889 |
| C    | 1.28599978  | -2.95057729 | -0.64175055 |
| C    | -0.06589313 | -2.66853347 | -0.59547401 |
| C    | -0.51749744 | -1.35842354 | -0.31048791 |
| C    | 0.43128558  | -0.35853888 | -0.08899174 |
| C    | 5.95777233  | -1.56154338 | -0.42388591 |
| C    | 6.60817646  | -2.38047966 | 0.50027589  |
| C    | 7.95071005  | -2.70359843 | 0.31271971  |
| C    | 8.64326336  | -2.21352427 | -0.79636829 |
| C    | 7.98498115  | -1.40590145 | -1.72395698 |
| C    | 6.63927896  | -1.08539149 | -1.54393892 |
| C    | -1.96766302 | -1.05500458 | -0.24603587 |
| C    | -2.88837931 | -1.99265372 | 0.25241345  |
| C    | -4.24966276 | -1.71734773 | 0.31016124  |
| C    | -4.74690067 | -0.47587018 | -0.12002331 |
| C    | -3.83503435 | 0.47210296  | -0.61374698 |
| C    | -2.47770661 | 0.18066233  | -0.6802053  |
| N    | -6.13338699 | -0.18710781 | -0.05808374 |
| C    | -6.75858001 | 0.54764017  | -1.10390043 |
| C    | -6.90780948 | -0.63246721 | 1.04951632  |
| C    | -7.6885531  | 1.55645654  | -0.80642107 |
| C    | -8.30833274 | 2.26545694  | -1.83333277 |
| C    | -8.00104226 | 1.99657217  | -3.16851449 |
| C    | -7.07017112 | 0.99955045  | -3.46688324 |
| C    | -6.4589116  | 0.27224967  | -2.44769944 |
| C    | -6.41123976 | -0.52126782 | 2.35808518  |
| C    | -7.17180135 | -0.96515716 | 3.43784031  |
| C    | -8.4426111  | -1.50748127 | 3.2366036   |

|   |             |             |             |
|---|-------------|-------------|-------------|
| C | -8.94279938 | -1.60986447 | 1.93708349  |
| C | -8.1822896  | -1.18607392 | 0.84922749  |
| H | 2.93065701  | 1.6768553   | 2.50125321  |
| H | 2.16783282  | 3.96669861  | 3.05097872  |
| H | 1.16858838  | 5.40611547  | 1.28665251  |
| H | 0.93881505  | 4.53119595  | -1.03051037 |
| H | 1.70601179  | 2.24020168  | -1.57319228 |
| H | 5.86606623  | 0.11416521  | 2.16041829  |
| H | 7.60723729  | 1.79376001  | 2.66733785  |
| H | 7.97387753  | 3.71440028  | 1.13087999  |
| H | 6.57240667  | 3.942966    | -0.9105479  |
| H | 4.8193158   | 2.26726508  | -1.40522701 |
| H | 1.6506178   | -3.9485485  | -0.85889197 |
| H | -0.7879346  | -3.45206572 | -0.80142947 |
| H | 0.09791374  | 0.63972202  | 0.16681915  |
| H | 6.05768634  | -2.76677888 | 1.35105484  |
| H | 8.45490224  | -3.34161647 | 1.03228705  |
| H | 9.68985483  | -2.46522971 | -0.93943623 |
| H | 8.51503583  | -1.02818281 | -2.59307541 |
| H | 6.11716792  | -0.46665994 | -2.26601404 |
| H | -2.53269104 | -2.9525424  | 0.61414209  |
| H | -4.9358071  | -2.46264054 | 0.69742348  |
| H | -4.19805164 | 1.43603715  | -0.95328158 |
| H | -1.80048185 | 0.92541602  | -1.08677694 |
| H | -7.9206251  | 1.77766252  | 0.2299067   |
| H | -9.02563568 | 3.04260963  | -1.58533158 |
| H | -8.48078869 | 2.55592822  | -3.96566381 |
| H | -6.82682769 | 0.77332447  | -4.50108979 |
| H | -5.7472925  | -0.51138663 | -2.6850314  |
| H | -5.43032676 | -0.08739467 | 2.5205472   |
| H | -6.77232434 | -0.87192704 | 4.44366675  |
| H | -9.03511626 | -1.84553966 | 4.08107185  |
| H | -9.92696238 | -2.03590265 | 1.76421574  |
| H | -8.56935921 | -1.27985619 | -0.15981208 |

---

**Table S8.** The natural transition orbits distribution of **PADP**.

| PADP           | Hole | Transition character | Particle |
|----------------|------|----------------------|----------|
| S <sub>1</sub> |      | HLCT<br>98.5%        |          |
| T <sub>1</sub> |      | HLCT<br>98.8%        |          |
| T <sub>2</sub> |      | HLCT<br>95.4%        |          |
| T <sub>3</sub> |      | HLCT<br>67.1%        |          |
| T <sub>4</sub> |      | HLCT<br>58.5%        |          |

**Table S9.** The natural transition orbits distribution of **PADP-pCz**.

| PADP-pCz       | Hole | Transition character | Particle |
|----------------|------|----------------------|----------|
| S <sub>1</sub> |      | HLCT<br>97.0%        |          |
| T <sub>1</sub> |      | HLCT<br>97.0%        |          |
| T <sub>2</sub> |      | LE<br>95.1%          |          |
| T <sub>3</sub> |      | LE<br>67.1%          |          |
| T <sub>4</sub> |      | LE<br>82.8%          |          |

**Table S10.** The natural transition orbits distribution of **PADP-mCz**.

| PADP-mCz       | Hole                                                                              | Transition character | Particle                                                                            |
|----------------|-----------------------------------------------------------------------------------|----------------------|-------------------------------------------------------------------------------------|
| S <sub>1</sub> | 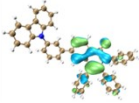 | HLCT<br>97.1%        |  |
| T <sub>1</sub> |  | HLCT<br>97.2%        |  |
| T <sub>2</sub> |  | LE<br>95.3%          |  |
| T <sub>3</sub> |  | LE<br>87.7%          |  |
| T <sub>4</sub> |  | LE<br>82.9%          |  |

**Table S11.** The natural transition orbits distribution of PADP-TPA.

| PADP-TPA       | Hole                                                                                | Transition character | Particle                                                                              |
|----------------|-------------------------------------------------------------------------------------|----------------------|---------------------------------------------------------------------------------------|
| S <sub>1</sub> | 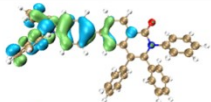 | HLCT<br>97.2%        |  |
| T <sub>1</sub> |  | HLCT<br>93.6%        |  |
| T <sub>2</sub> |  | HLCT<br>92.6%        |  |
| T <sub>3</sub> |  | LE<br>93.1%          |  |
| T <sub>4</sub> |  | LE<br>87.2%          |  |

## S-5 Additional Spectra and Data

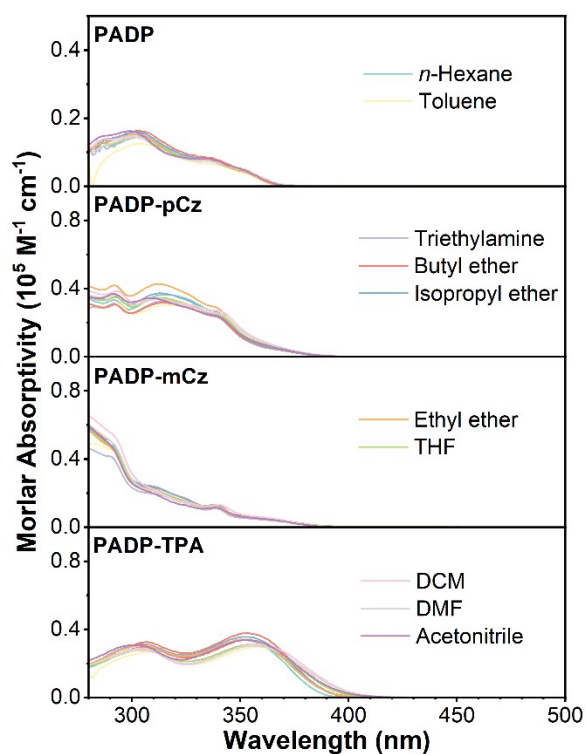

**Figure S6.** UV-vis absorption spectra of PADD, PADD-pCz, PADD-mCz, and PADD-TPA in solvents of different polarities.

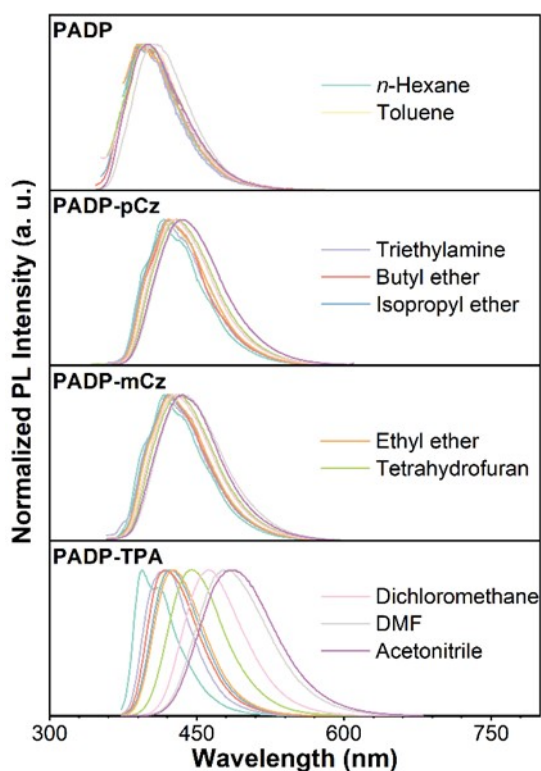

**Figure S7.** PL spectra of PADD, PADD-pCz, PADD-mCz, and PADD-TPA in solvents of different polarities.

**Table S12.** Detailed parameters of photophysical properties of **PADP**.

| Solvents           | $\epsilon$ | n     | $f(\epsilon, n)$ | $\lambda_{\text{abs}}$ [nm] | $\lambda_{\text{em}}$ [nm] | $\nu_{\text{a}}-\nu_{\text{f}}$ [ $\text{cm}^{-1}$ ] |
|--------------------|------------|-------|------------------|-----------------------------|----------------------------|------------------------------------------------------|
| Hexane             | 1.9        | 1.375 | 0.0012           | 302                         | 390                        | 7471.56                                              |
| Toluene            | 2.4        | 1.497 | 0.013            | 304                         | 396                        | 7642.21                                              |
| Triethylamine      | 2.42       | 1.401 | 0.048            | 302                         | 396                        | 7405.64                                              |
| Butyl ether        | 3.08       | 1.399 | 0.096            | 302                         | 394                        | 7731.87                                              |
| Isopropyl ether    | 3.88       | 1.368 | 0.145            | 302                         | 391                        | 7537.14                                              |
| Ethyl ether        | 4.34       | 1.352 | 0.167            | 302                         | 391                        | 7537.14                                              |
| Tetrahydrofuran    | 7.58       | 1.407 | 0.21             | 302                         | 396                        | 7860.06                                              |
| Dichloromethane    | 8.93       | 1.424 | 0.217            | 300                         | 398                        | 8207.71                                              |
| Dimethyl formamide | 37         | 1.427 | 0.276            | 302                         | 406                        | 8482.04                                              |
| Acetonitrile       | 37.5       | 1.344 | 0.305            | 299                         | 402                        | 8569.19                                              |

**Table S13.** Detailed parameters of photophysical properties of **PADP-pCz**.

| Solvents           | $\epsilon$ | n     | $f(\epsilon, n)$ | $\lambda_{\text{abs}}$ [nm] | $\lambda_{\text{em}}$ [nm] | $\nu_{\text{a}}-\nu_{\text{f}}$ [ $\text{cm}^{-1}$ ] |
|--------------------|------------|-------|------------------|-----------------------------|----------------------------|------------------------------------------------------|
| Hexane             | 1.9        | 1.375 | 0.0012           | 315                         | 416                        | 7707.57                                              |
| Toluene            | 2.4        | 1.497 | 0.013            | 315                         | 423                        | 8105.37                                              |
| Triethylamine      | 2.42       | 1.401 | 0.048            | 314                         | 420                        | 8037.61                                              |
| Butyl ether        | 3.08       | 1.399 | 0.096            | 313                         | 423                        | 8308.22                                              |
| Isopropyl ether    | 3.88       | 1.368 | 0.145            | 312                         | 421                        | 8298.31                                              |
| Ethyl ether        | 4.34       | 1.352 | 0.167            | 312                         | 422                        | 8354.60                                              |
| Tetrahydrofuran    | 7.58       | 1.407 | 0.21             | 313                         | 430                        | 8693.07                                              |
| Dichloromethane    | 8.93       | 1.424 | 0.217            | 310                         | 427                        | 8838.86                                              |
| Dimethyl formamide | 37         | 1.427 | 0.276            | 311                         | 438                        | 9323.29                                              |
| Acetonitrile       | 37.5       | 1.344 | 0.305            | 308                         | 436                        | 9531.75                                              |

**Table S14.** Detailed parameters of photophysical properties of **PADP-mCz**.

| Solvents           | $\epsilon$ | n     | $f(\epsilon, n)$ | $\lambda_{\text{abs}}$ [nm] | $\lambda_{\text{em}}$ [nm] | $\nu_{\text{a}}-\nu_{\text{f}}$ [ $\text{cm}^{-1}$ ] |
|--------------------|------------|-------|------------------|-----------------------------|----------------------------|------------------------------------------------------|
| Hexane             | 1.9        | 1.375 | 0.0012           | 338                         | 417                        | 5604.98                                              |
| Toluene            | 2.4        | 1.497 | 0.013            | 340                         | 423                        | 5771.10                                              |
| Triethylamine      | 2.42       | 1.401 | 0.048            | 338                         | 419                        | 5719.45                                              |
| Butyl ether        | 3.08       | 1.399 | 0.096            | 338                         | 420                        | 5776.28                                              |
| Isopropyl ether    | 3.88       | 1.368 | 0.145            | 338                         | 421                        | 5832.83                                              |
| Ethyl ether        | 4.34       | 1.352 | 0.167            | 338                         | 425                        | 6056.39                                              |
| Tetrahydrofuran    | 7.58       | 1.407 | 0.21             | 339                         | 429                        | 6188.50                                              |
| Dichloromethane    | 8.93       | 1.424 | 0.217            | 339                         | 429                        | 6188.50                                              |
| Dimethyl formamide | 37         | 1.427 | 0.276            | 339                         | 437                        | 6615.23                                              |
| Acetonitrile       | 37.5       | 1.344 | 0.305            | 338                         | 435                        | 6597.29                                              |

**Table S15.** Detailed parameters of photophysical properties of **PADP-TPA**.

| Solvents           | $\epsilon$ | n     | $f(\epsilon, n)$ | $\lambda_{\text{abs}}$ [nm] | $\lambda_{\text{em}}$ [nm] | $\nu_{\text{a}}-\nu_{\text{f}}$ [ $\text{cm}^{-1}$ ] |
|--------------------|------------|-------|------------------|-----------------------------|----------------------------|------------------------------------------------------|
| Hexane             | 1.9        | 1.375 | 0.0012           | 351                         | 394                        | 3109.32                                              |
| Toluene            | 2.4        | 1.497 | 0.013            | 358                         | 420                        | 4123.44                                              |
| Triethylamine      | 2.42       | 1.401 | 0.048            | 353                         | 416                        | 4290.15                                              |
| Butyl ether        | 3.08       | 1.399 | 0.096            | 352                         | 417                        | 4428.28                                              |
| Isopropyl ether    | 3.88       | 1.368 | 0.145            | 352                         | 423                        | 4768.43                                              |
| Ethyl ether        | 4.34       | 1.352 | 0.167            | 353                         | 427                        | 4909.41                                              |
| Tetrahydrofuran    | 7.58       | 1.407 | 0.21             | 356                         | 444                        | 5567.37                                              |
| Dichloromethane    | 8.93       | 1.424 | 0.217            | 357                         | 462                        | 6366.18                                              |
| Dimethyl formamide | 37         | 1.427 | 0.276            | 356                         | 477                        | 7125.53                                              |
| Acetonitrile       | 37.5       | 1.344 | 0.305            | 353                         | 489                        | 7878.71                                              |

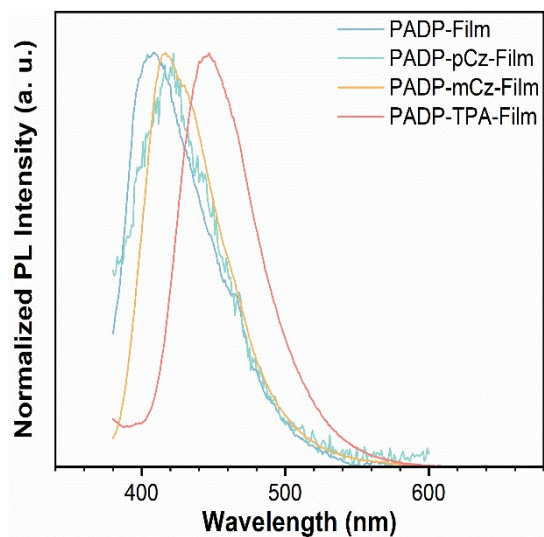

**Figure S8.** Vacuum-deposited neat film data of **PADP**, **PADP-pCz**, **PADP-mCz**, and **PADP-TPA**.

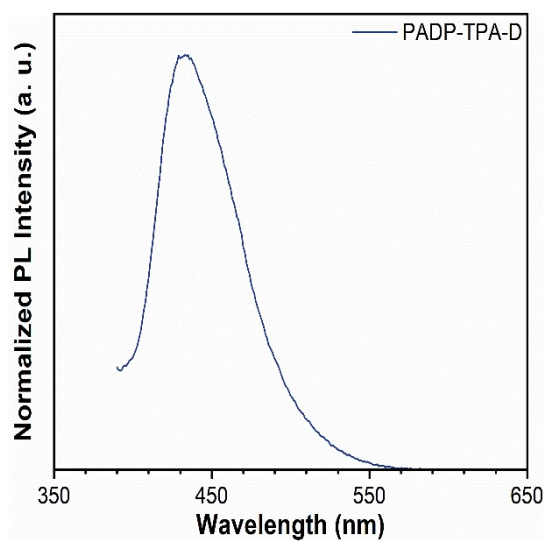

**Figure S9.** Vacuum-deposited doped film data of **PADP-TPA**.

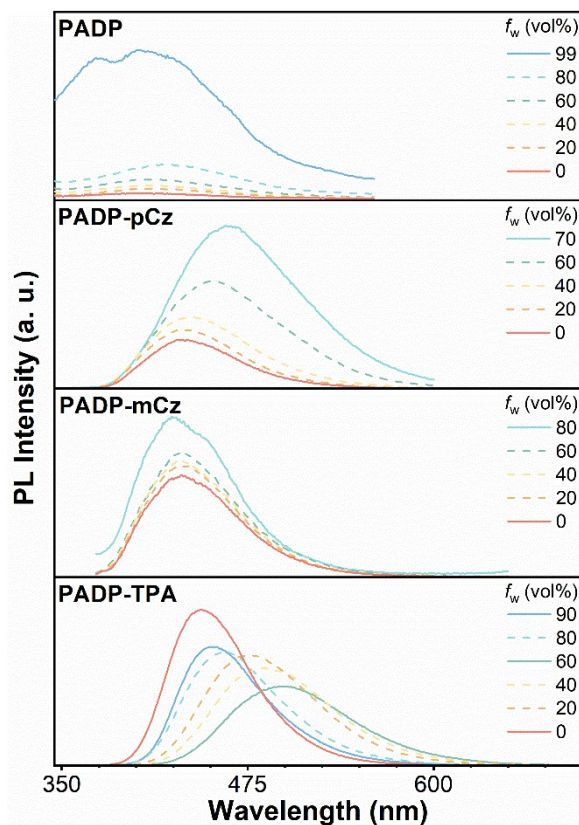

**Figure S10.** PL spectra in THF/water mixtures ( $10^{-5}$  M) with different water fractions ( $f_w$ ).

### The Lippert-Mataga model

The Lippert-Mataga model is estimated according to Equation S1

$$hc(v_a - v_f) = hc(v_a^0 - v_f^0) + \frac{2(\mu_e - \mu_g)^2}{a_0^3} f(\varepsilon, n) \quad \text{S1}$$

or

$$\mu_e = \mu_g + \left\{ \frac{hca_0^3}{2} \cdot \left[ \frac{d(v_a - v_f)}{df(\varepsilon, n)} \right] \right\}^{1/2} \quad \text{S2}$$

where  $\mu_e$  is the dipole moment of excited state,  $\mu_g$  is the dipole moment of ground state,  $h$  is the Plank constant,  $c$  is the light speed in vacuum,  $a_0$  is the solvent Onsager cavity radius,  $v_a - v_f$  is the Stokes shift,  $f(\varepsilon, n)$  is the orientational polarizability of solvents and

$f(\varepsilon, n) = \left[ \frac{\varepsilon - 1}{2\varepsilon + 1} - \frac{n^2 - 1}{2n^2 + 1} \right]$ .  $\varepsilon$  is the solvent dielectric constant and  $n$  is the solvent refractive

index.  $\mu_g$  was estimated by DFT (values: 3.72, 4.15, 5.16 and 3.81 D). The differential

$\frac{d(v_a - v_f)}{df(\varepsilon, n)}$  can be estimated based on the solvatochromic experiment data.

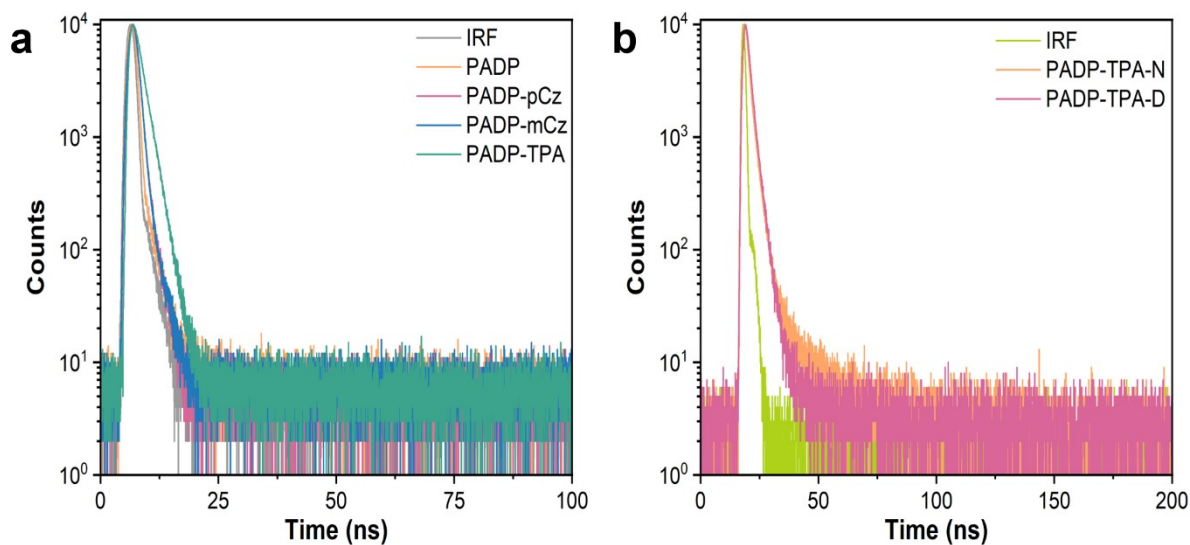

**Figure S11.** (a) Transient PL decay curve of **PADP**, **PADP-pCz**, **PADP-mCz** and **PADP-TPA** in  $10^{-5}$  M toluene solution at room temperature. (b) Transient PL decay curves of pure **PADP-TPA** films and 20 wt% doped in mCPBC films at room temperature.

**Table S16.** Detailed parameters of photophysical properties of **PADP-TPA**.

|            | <b>PADP-TPA</b>                 |                                                    |                                                       |
|------------|---------------------------------|----------------------------------------------------|-------------------------------------------------------|
|            | $\tau_F$ <sup>[a]</sup><br>[ns] | $k_r$ <sup>[b]</sup><br>[ $10^8$ S <sup>-1</sup> ] | $k_{nr}$ <sup>[c]</sup><br>[ $10^8$ S <sup>-1</sup> ] |
| TOL        | 1.75                            | 3.98                                               | 1.74                                                  |
| Neat Film  | 2.29                            | 2.87                                               | 1.49                                                  |
| Doped Film | 2.18                            | 3.72                                               | 0.87                                                  |

<sup>[a]</sup> Lifetime of the prompt and delayed fluorescence. <sup>[b]</sup>  $k_r$ : Radiative transition rate. <sup>[c]</sup>  $k_{nr}$ : Non-radiative transition rate.

The values of  $k_r$  and  $k_{nr}$  for molecules in different states can be calculated using the following formula:

$$k_r = PLQY/\tau_F \quad S3$$

$$k_{nr} = (1 - PLQY)/\tau_F \quad S4$$

Calculations of radiative and non-radiative transitions for PADP-TPA in solution and thin films reveal a significant decrease in non-radiative transition rates from solution to solid state. This is attributed to aggregation-induced restriction of intramolecular motion, which substantially reduces the non-radiative transition rate.

## S-6 Device Fabrication

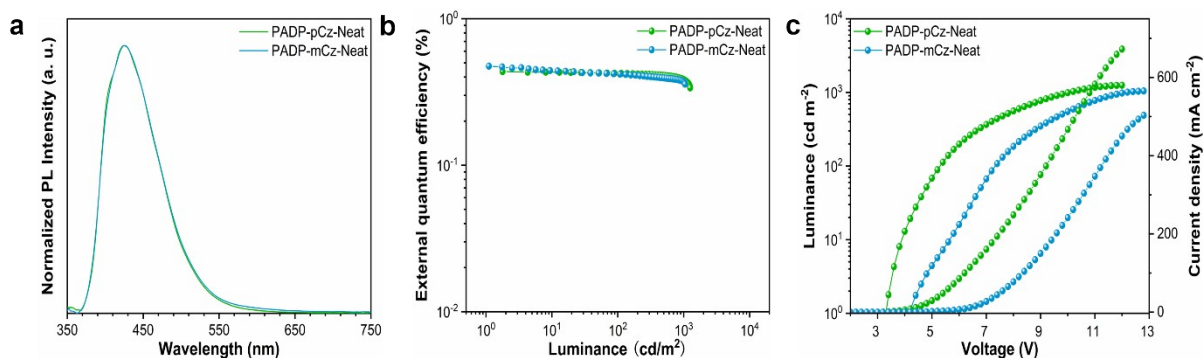

**Figure S12.** (a) EL emission spectrum of the neat film devices. (b) The maximum external quantum efficiency of the neat film devices. (c) Current density–voltage–luminance characteristics of the devices.

**Table S17.** EQE<sub>max</sub>- $\lambda_{EL}$  summary data of deep-blue ( $\lambda_{EL} \leq 450$  nm) AIE fluorescent materials applied to OLEDs.

| Emitter                     | $\lambda_{EL}$ (nm) | EQE <sub>max</sub> (%) | Reference |
|-----------------------------|---------------------|------------------------|-----------|
| PADP-TPA                    | 428                 | 9.20                   | This work |
| TPETPAPI                    | 444                 | 3.80                   | [1]       |
| <i>o</i> TPE- <i>m</i> TPE  | 435                 | 1.40                   | [2]       |
| Py-4 <i>m</i> TPE           | 436                 | 2.50                   | [3]       |
| 4,4-BtPE-PI                 | 448                 | 2.80                   | [4]       |
| TPBS-F                      | 438                 | 3.60                   | [5]       |
| TPP-PhCz                    | 436                 | 1.49                   | [6]       |
| TrPP-3C                     | 428                 | 2.62                   | [7]       |
| DPP-DPhC                    | 424                 | 5.73                   | [8]       |
| TPB-AC                      | 448                 | 7.00                   | [9]       |
| TPBCzC2                     | 423                 | 4.78                   | [10]      |
| TPB-PAPC                    | 450                 | 6.00                   | [11]      |
| CN-TPB-TPA                  | 448                 | 7.27                   | [12]      |
| TPEA                        | 445                 | 8.00                   | [13]      |
| 1                           | 444                 | 2.46                   | [14]      |
| TPA-3TPP                    | 436                 | 1.72                   | [15]      |
| <i>m</i> TPE-2 <i>m</i> TPE | 449                 | 1.30                   | [16]      |
| DPVBi                       | 442                 | 2.30                   | [17]      |

|                  |     |      |      |
|------------------|-----|------|------|
| BTPE-PI          | 450 | 4.00 | [18] |
| Si- <i>m</i> TPE | 432 | 1.21 | [19] |
| TPA-CN-TPA       | 428 | 3.98 | [20] |
| 2TPA-CN          | 445 | 0.66 | [21] |
| 2TriPE-CzMCN     | 430 | 8.84 | [22] |

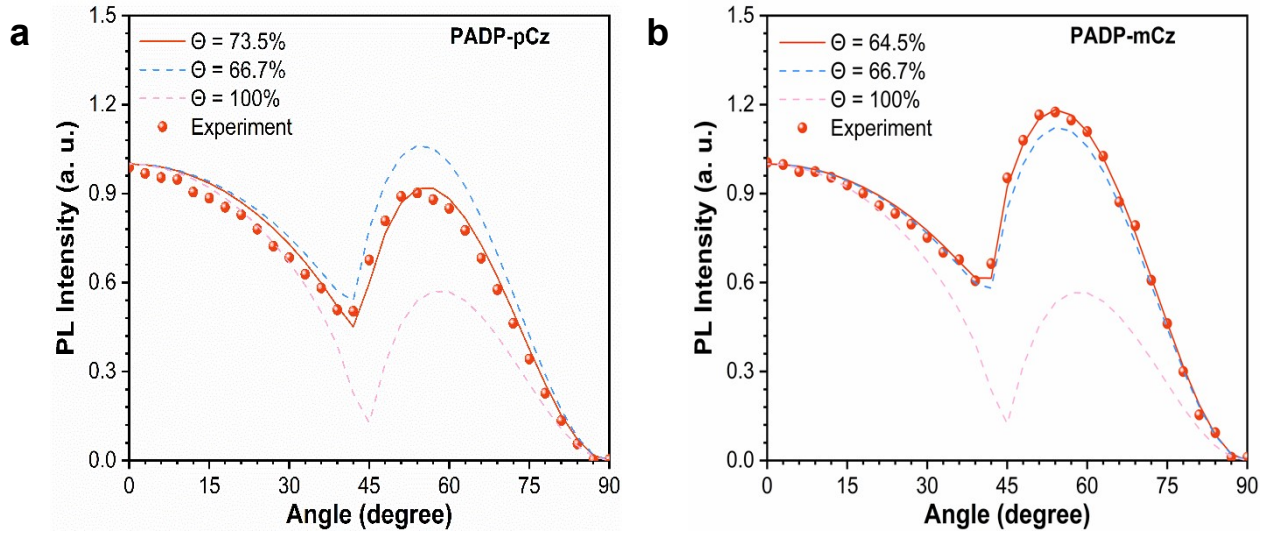

**Figure S13.** Measured the angle-dependent p-polarized PL spectra of a) PADP-pCz and b) PADP-mCz in neat film.

Angle-dependent PL measurements illustrate that the horizontal dipole orientation ratios ( $\Theta//$ ) of PADP-pCz and PADP-mCz nondoped device are 73.5% and 64.5%. Further optical simulations were performed based on the device structure, yielding  $\eta_{out}$  values of 27.60% and 25.20%.

**Table S18.** Summary of vacuum evaporation film data for the EML.

| EML                    | $\eta_{out}$ | $EQE_c$ | EQE |
|------------------------|--------------|---------|-----|
| PADP-pCz               | 0.276        | 0.5     | 0.4 |
| PADP-mCz               | 0.252        | 0.5     | 0.5 |
| PADP-TPA               | 0.364        | 6.0     | 6.7 |
| MCPBC: 20 wt% PDPA-TPA | 0.356        | 7.2     | 9.2 |

$\eta_{out}$ : The light outcoupling efficiency;  $EQE_c$ : The maximum exciton utilization efficiency of conventional fluorescent materials is 25%, which is adopted as the reference value for calculations; EQE: Experimental measured values.

The calculation of  $\text{EQE}_e$  is based on Equation 1 in the main text.  $\gamma$  denotes the electron-hole recombination efficiency, which is set to 100% herein;  $\eta_{PL}$  represents the quantum yield (QY) of the vacuum-evaporated films;  $\eta_r$  signifies the radiative exciton utilization efficiency, with a value at 25%; and  $\eta_{out}$  stands for the light outcoupling efficiency.

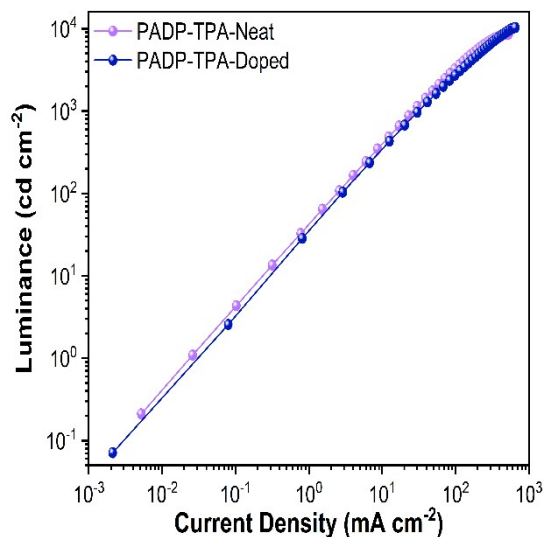

**Figure S14.** Current density-luminance plots.

Calculations indicate that both the pure and doped films of PADP-TPA exhibit an exciton utilization rate exceeding 25%, demonstrating that the existence of triplet-to-singlet exciton conversion in the electroluminescence, as shown in Figure S14. Below a current density of 100 mA cm<sup>-2</sup>, the device exhibits a good linear relationship between current density and electroluminescence brightness, indicating that the maximum external quantum efficiency of the device does not originate from the contribution of the TTA mechanism.

## S-7 NMR Spectroscopies and Mass spectrums

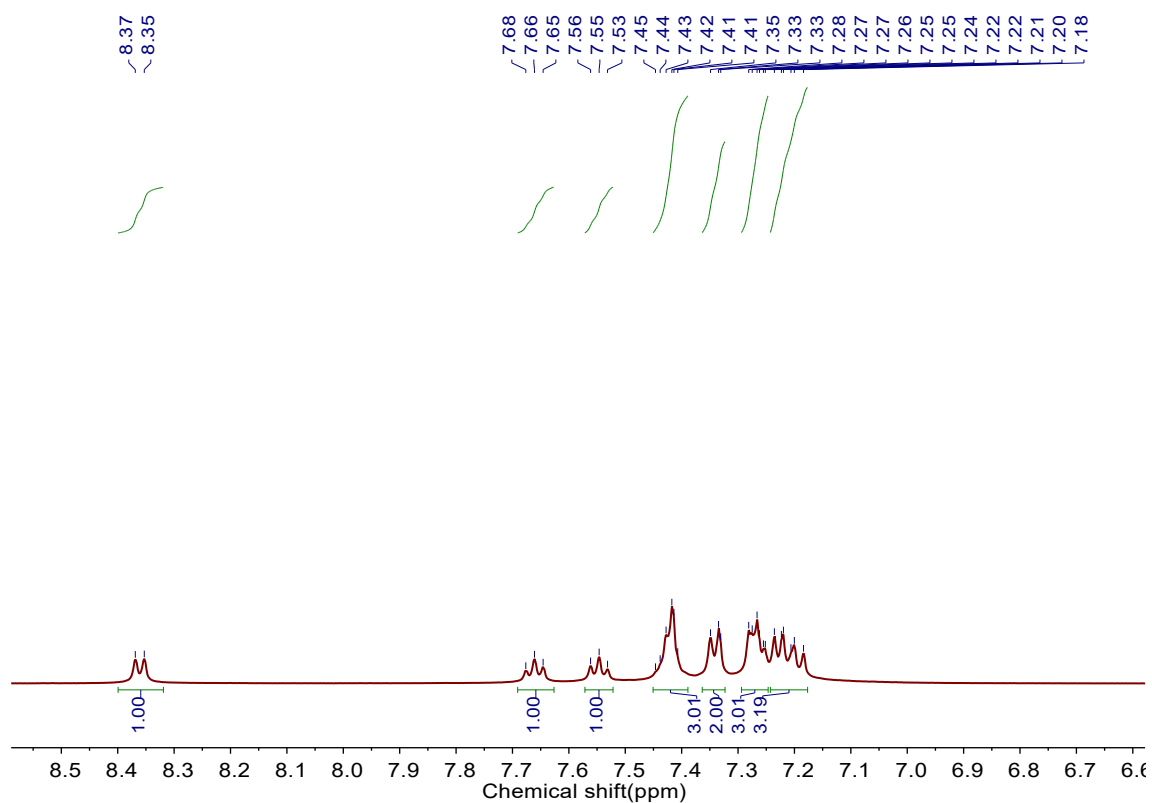

Figure S15. The  $^1\text{H}$  NMR spectra of PADA in  $\text{CH}_2\text{Cl}_2$ .

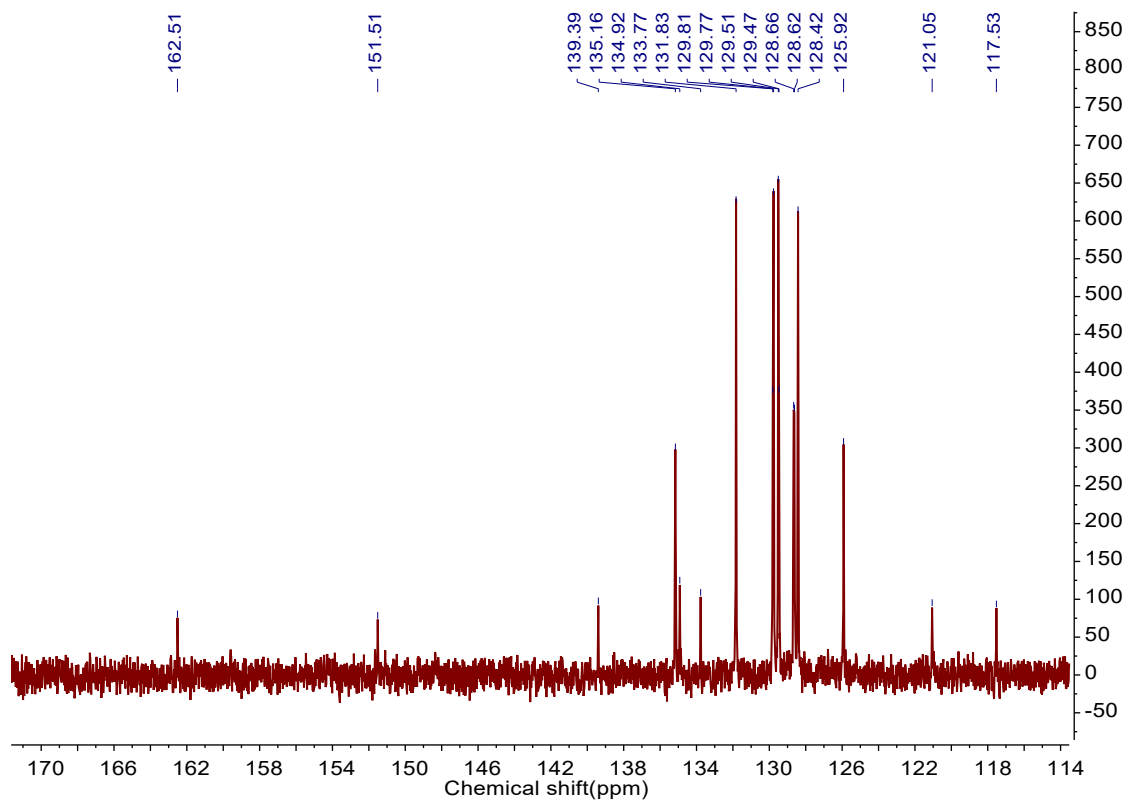

Figure S16. The  $^{13}\text{C}$  NMR spectra of PADP in  $\text{CD}_2\text{Cl}_2$ .

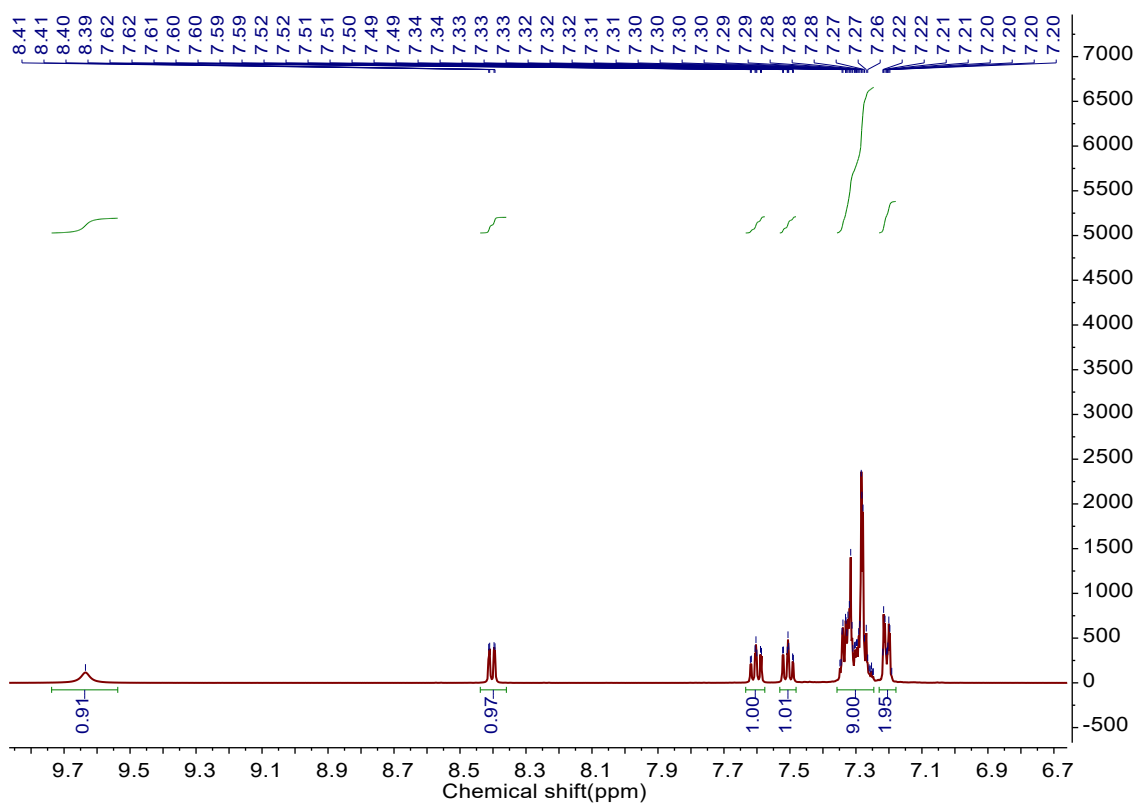

Figure S17. The  $^1\text{H}$  NMR spectra of PADH in  $\text{CD}_2\text{Cl}_2$ .

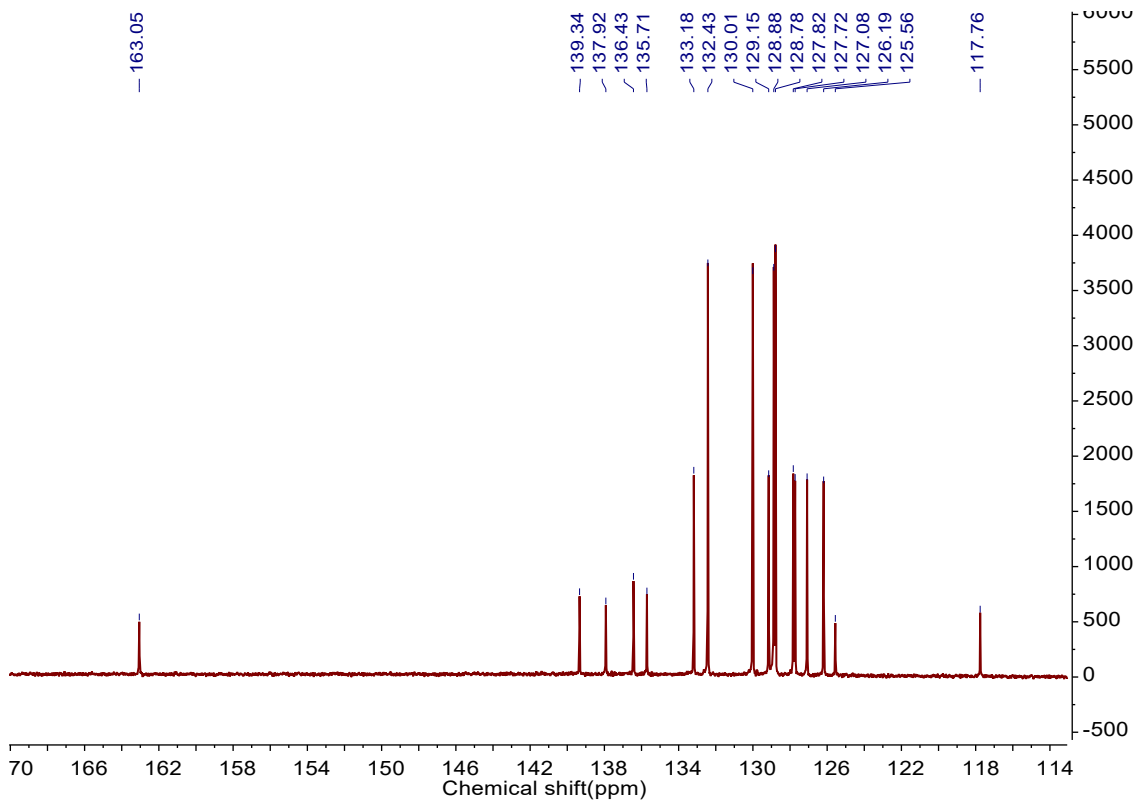

Figure S18. The  $^{13}\text{C}$  NMR spectra of PADH in  $\text{CD}_2\text{Cl}_2$ .

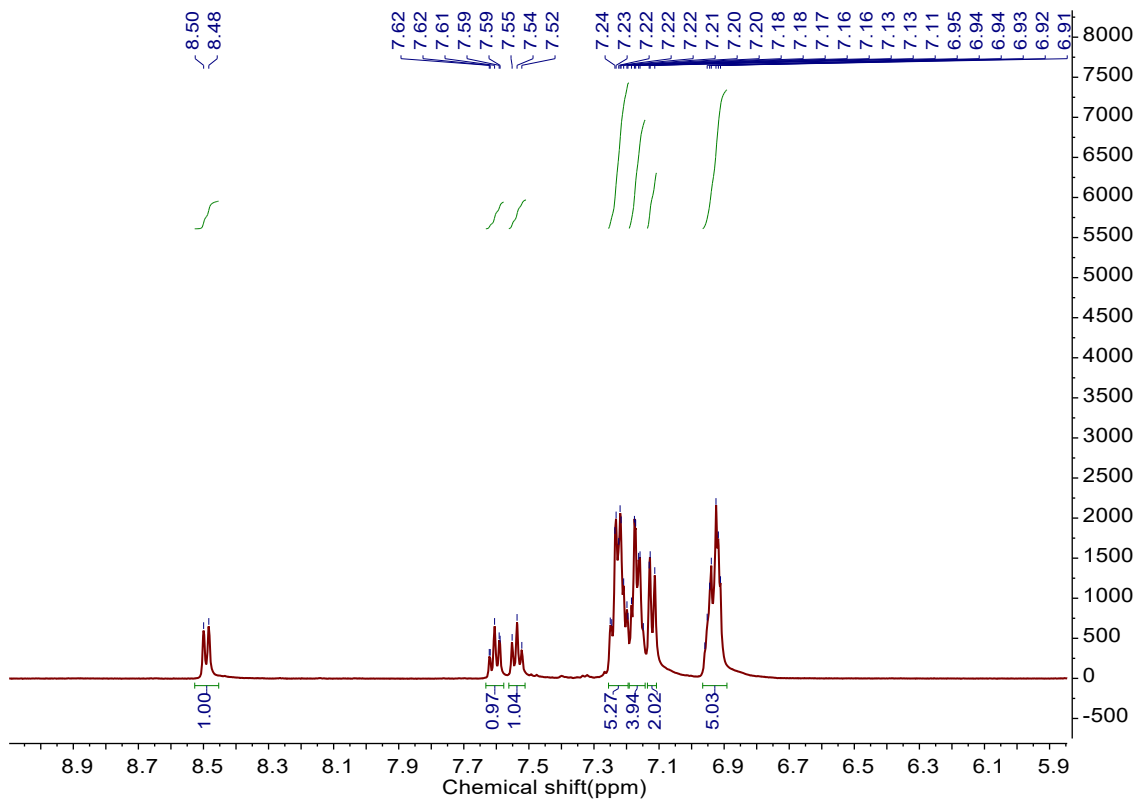

Figure S19. The  $^1\text{H}$  NMR spectra of PADP in  $\text{CD}_2\text{Cl}_2$ .

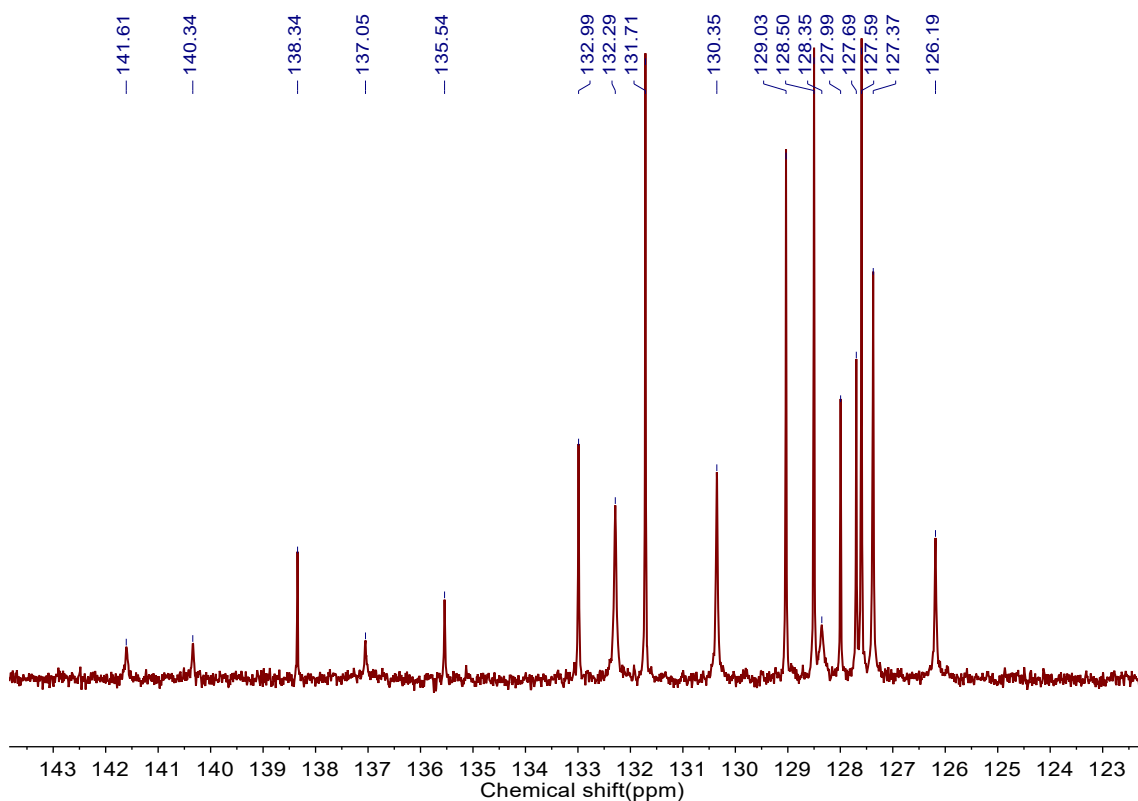

Figure S20. The  $^{13}\text{C}$  NMR spectra of PADP in  $\text{CD}_2\text{Cl}_2$ .

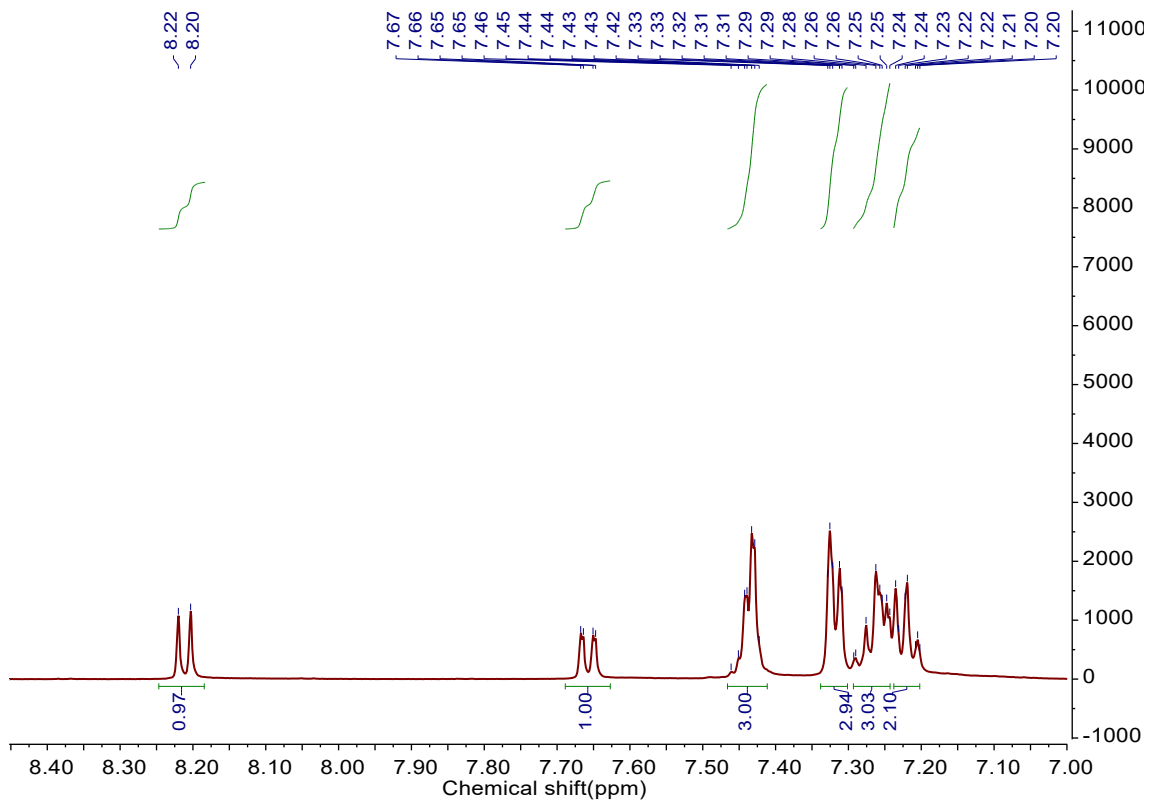

**Figure S21.** The  $^1\text{H}$  NMR spectra of PADA-Br in  $\text{CD}_2\text{Cl}_2$ .

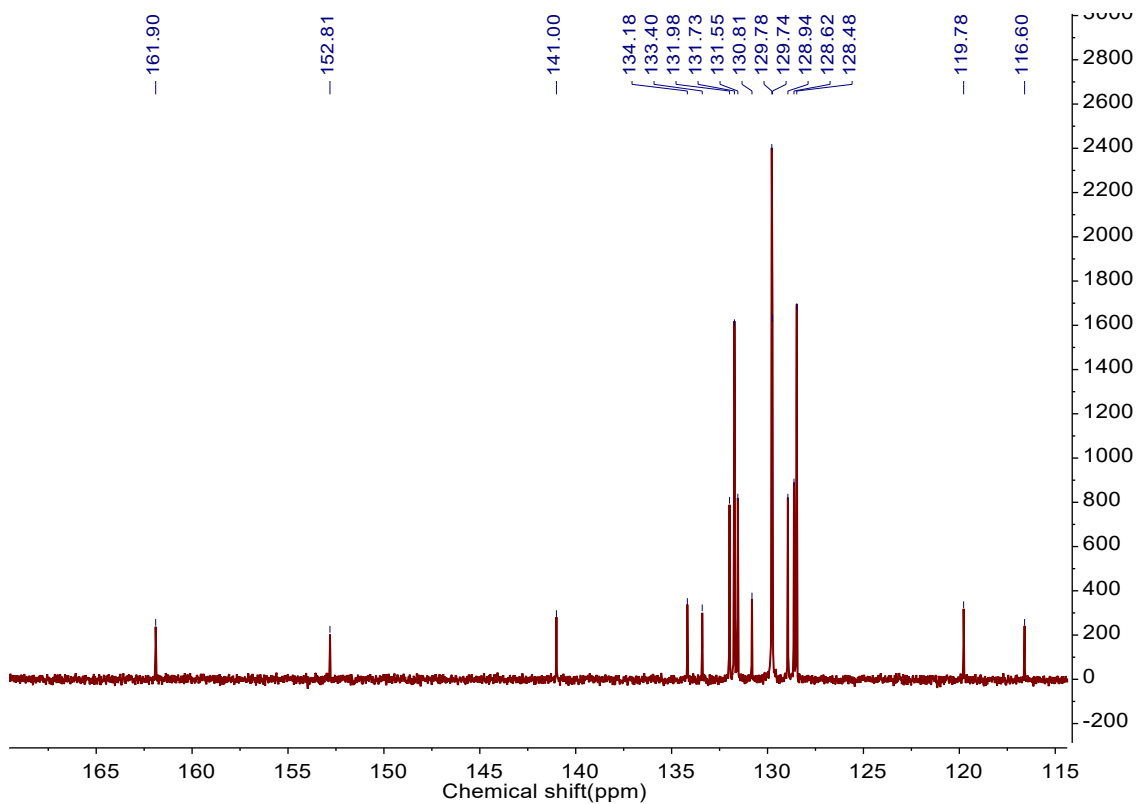

**Figure S22.** The  $^{13}\text{C}$  NMR spectra of PADA-Br in  $\text{CD}_2\text{Cl}_2$ .

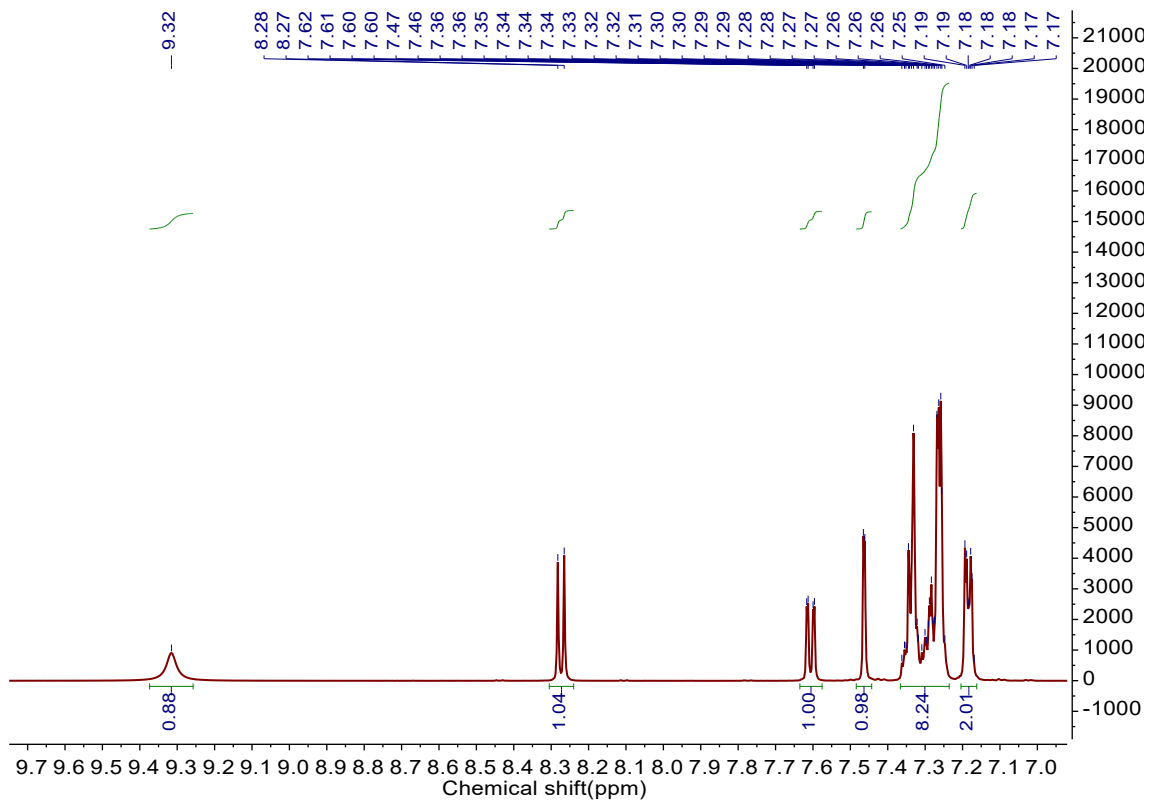

Figure S23. The  $^1\text{H}$  NMR spectra of PADH-Br in  $\text{CD}_2\text{Cl}_2$ .

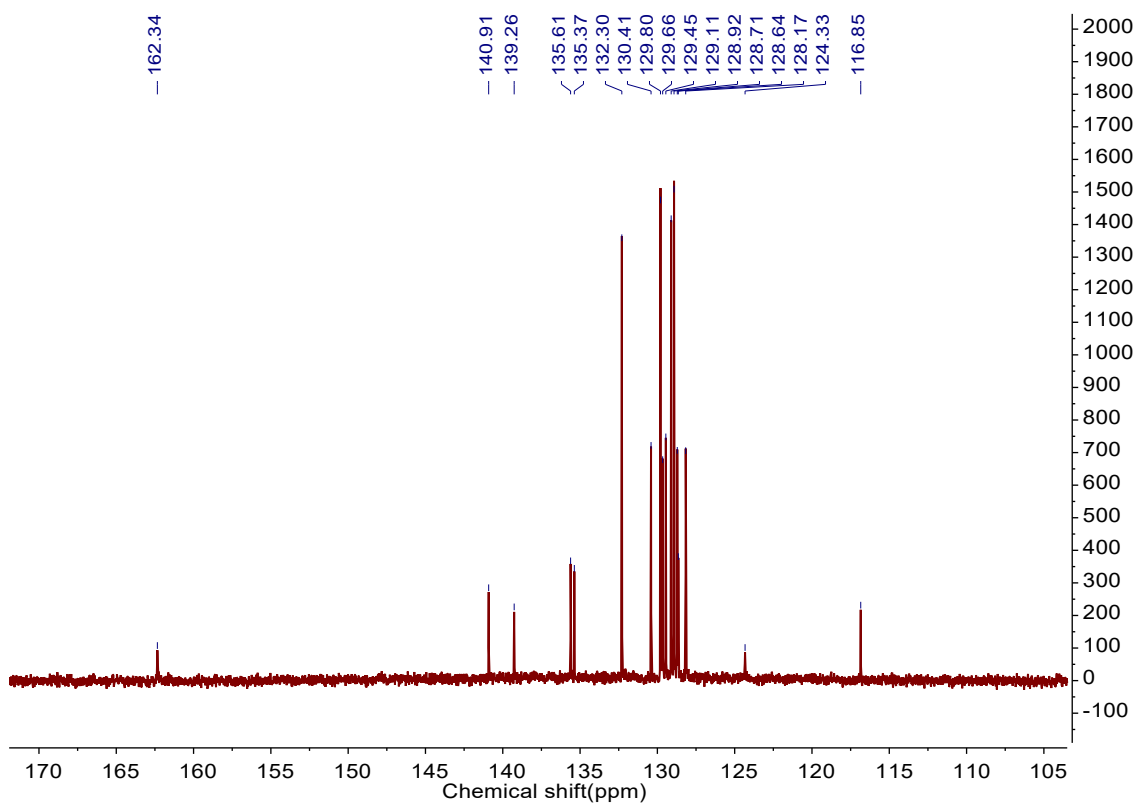

Figure S24. The  $^{13}\text{C}$  NMR spectra of PADH-Br in  $\text{CD}_2\text{Cl}_2$ .

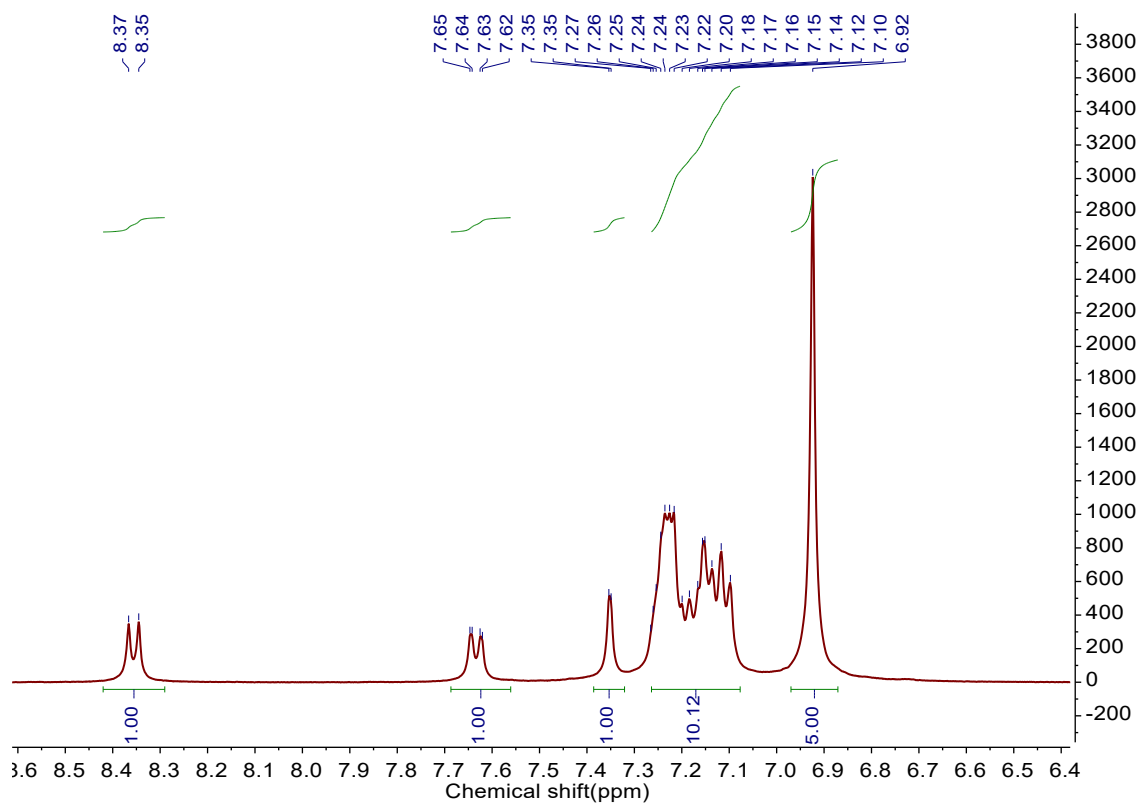

**Figure S25.** The  $^1\text{H}$  NMR spectra of PADP-Br in  $\text{CD}_2\text{Cl}_2$ .

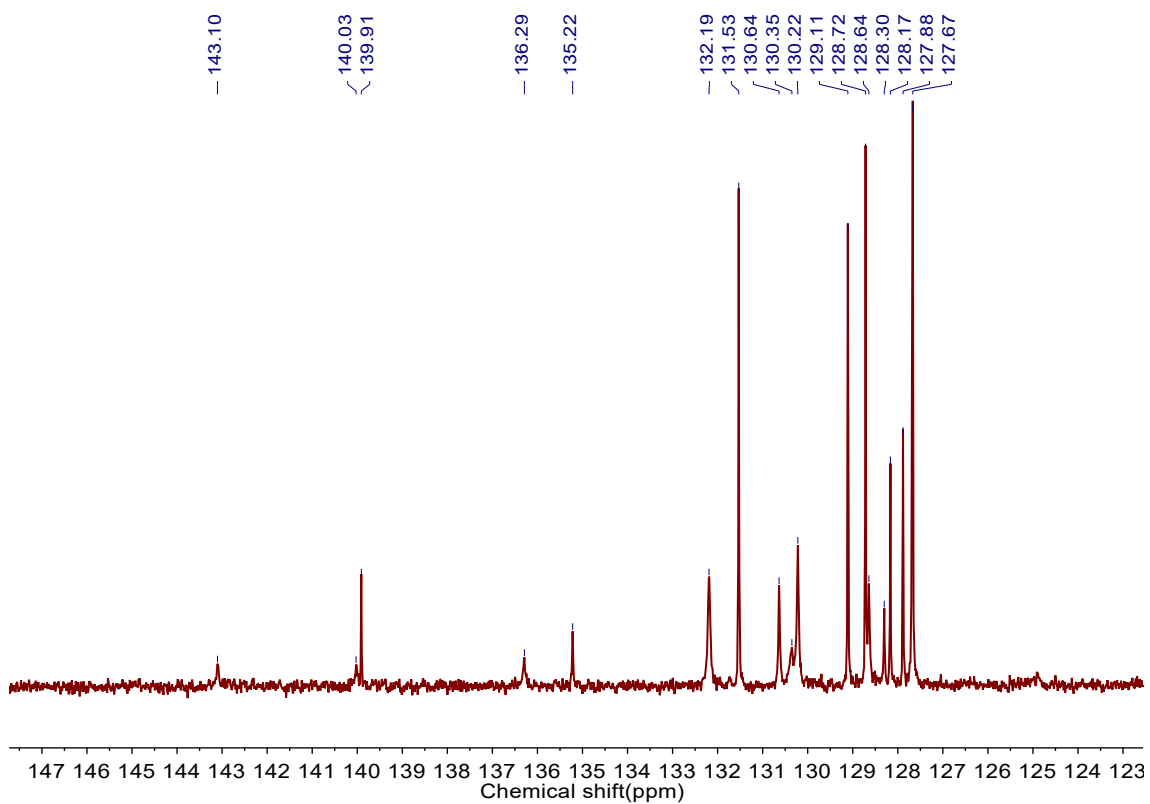

**Figure S26.** The  $^{13}\text{C}$  NMR spectra of PADP-Br in  $\text{CD}_2\text{Cl}_2$ .

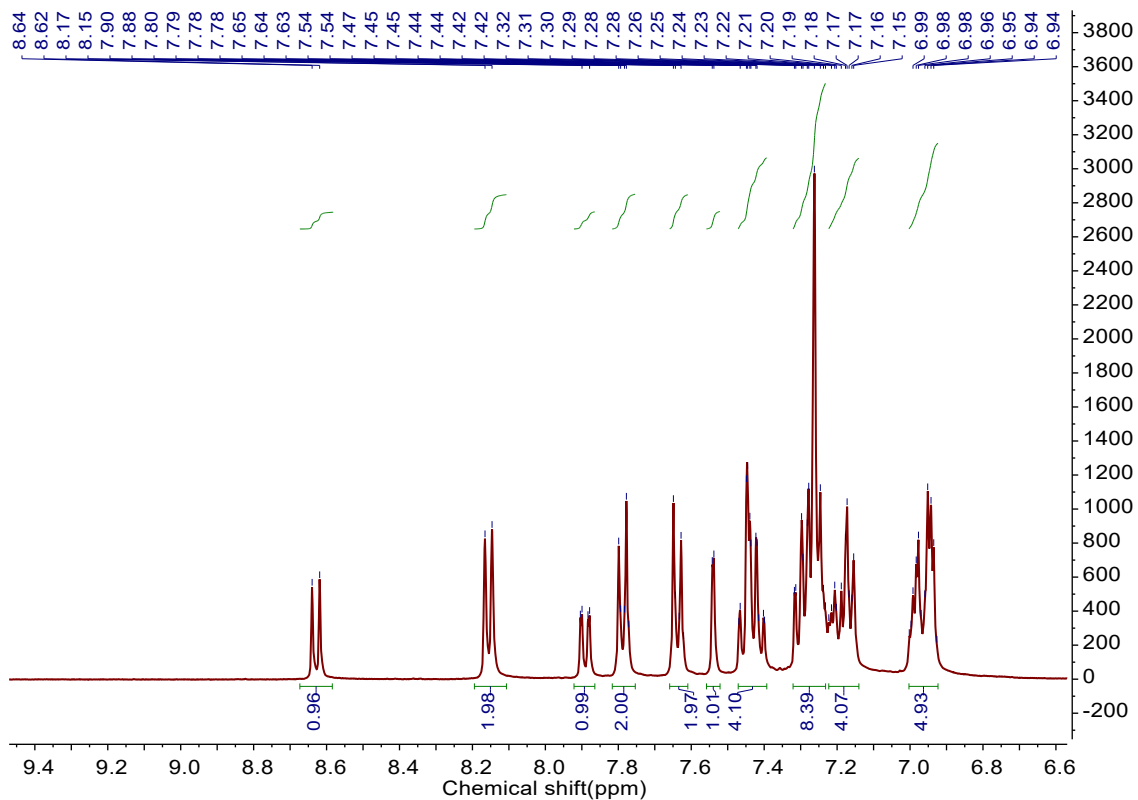

Figure S27. The  $^1\text{H}$  NMR spectra of PADP-pCz in  $\text{CD}_2\text{Cl}_2$ .

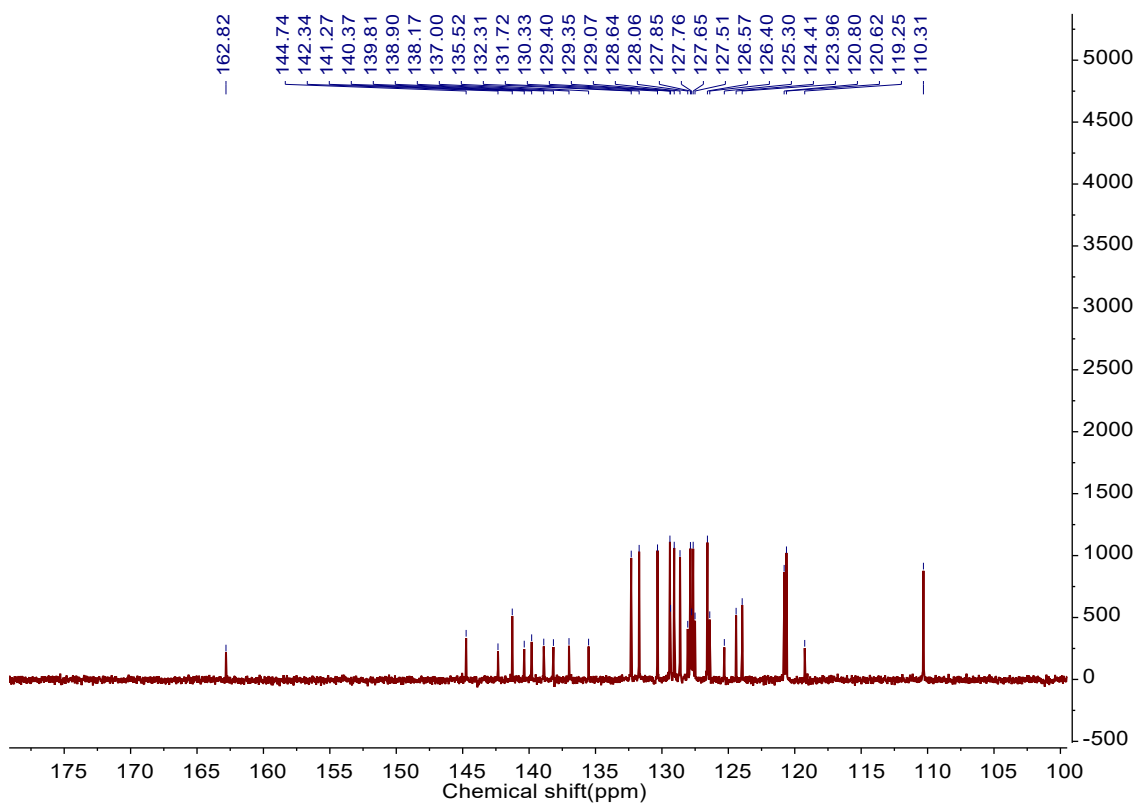

Figure S28. The  $^{13}\text{C}$  NMR spectra of PADP-pCz in  $\text{CD}_2\text{Cl}_2$ .

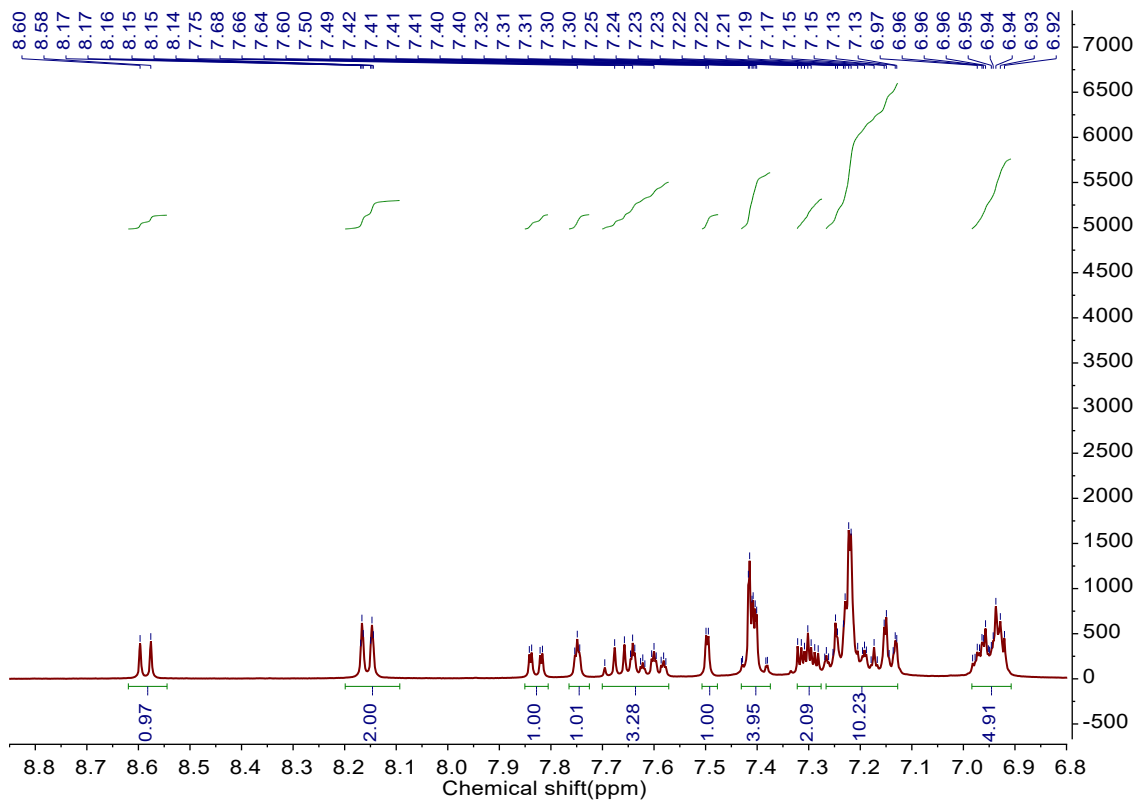

**Figure S29.** The  $^1\text{H}$  NMR spectra of PADP-mCz in  $\text{CD}_2\text{Cl}_2$ .

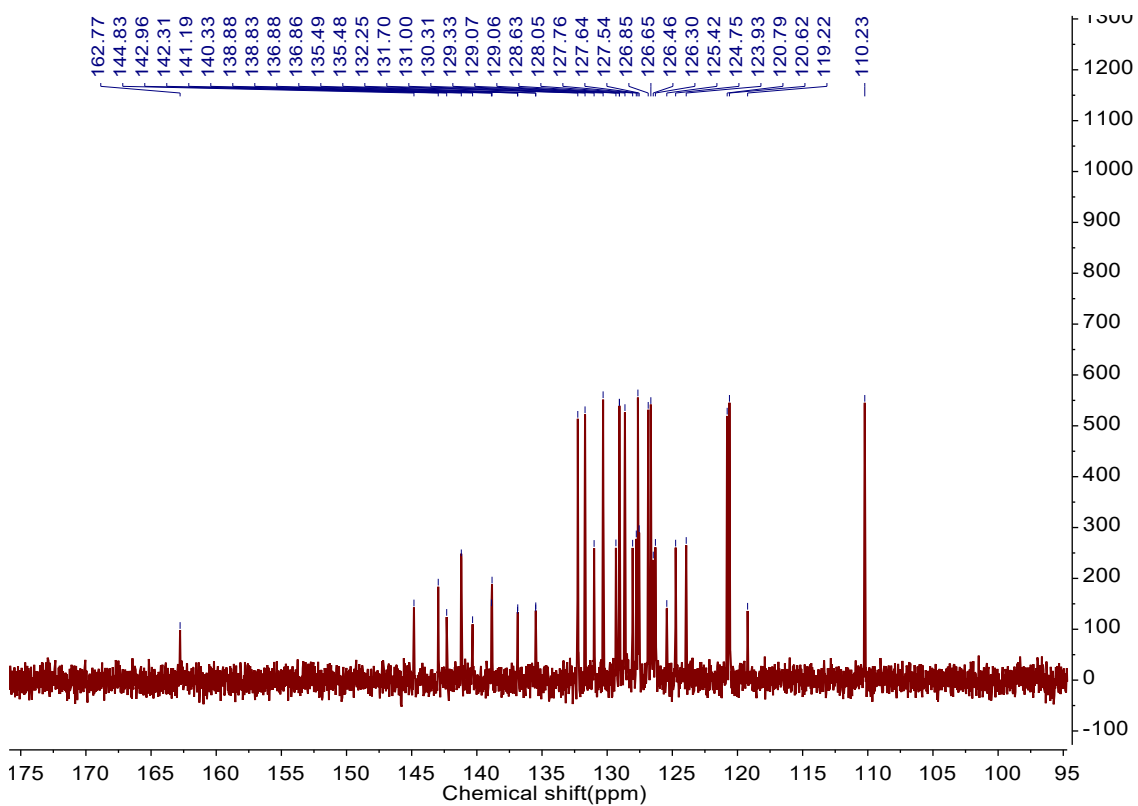

**Figure S30.** The  $^{13}\text{C}$  NMR spectra of PADP-mCz in  $\text{CD}_2\text{Cl}_2$ .

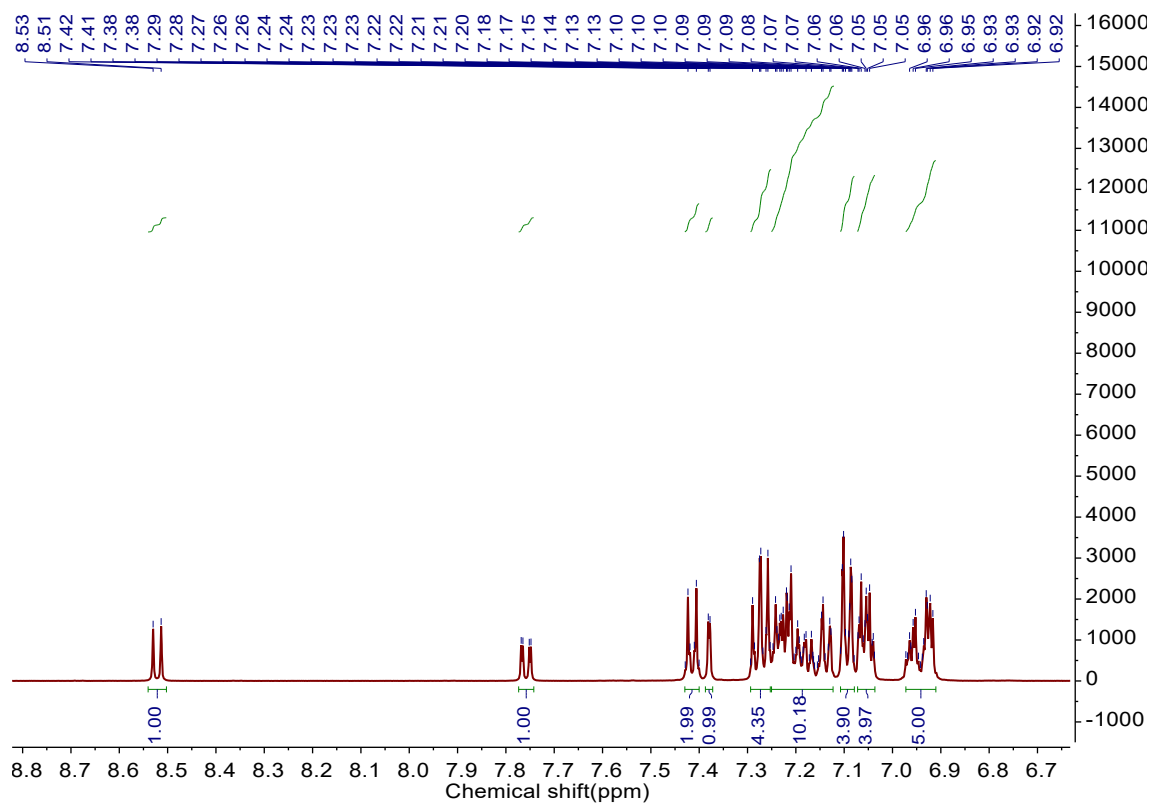

Figure S31. The  $^1\text{H}$  NMR spectra of PADP-TPA in  $\text{CD}_2\text{Cl}_2$ .

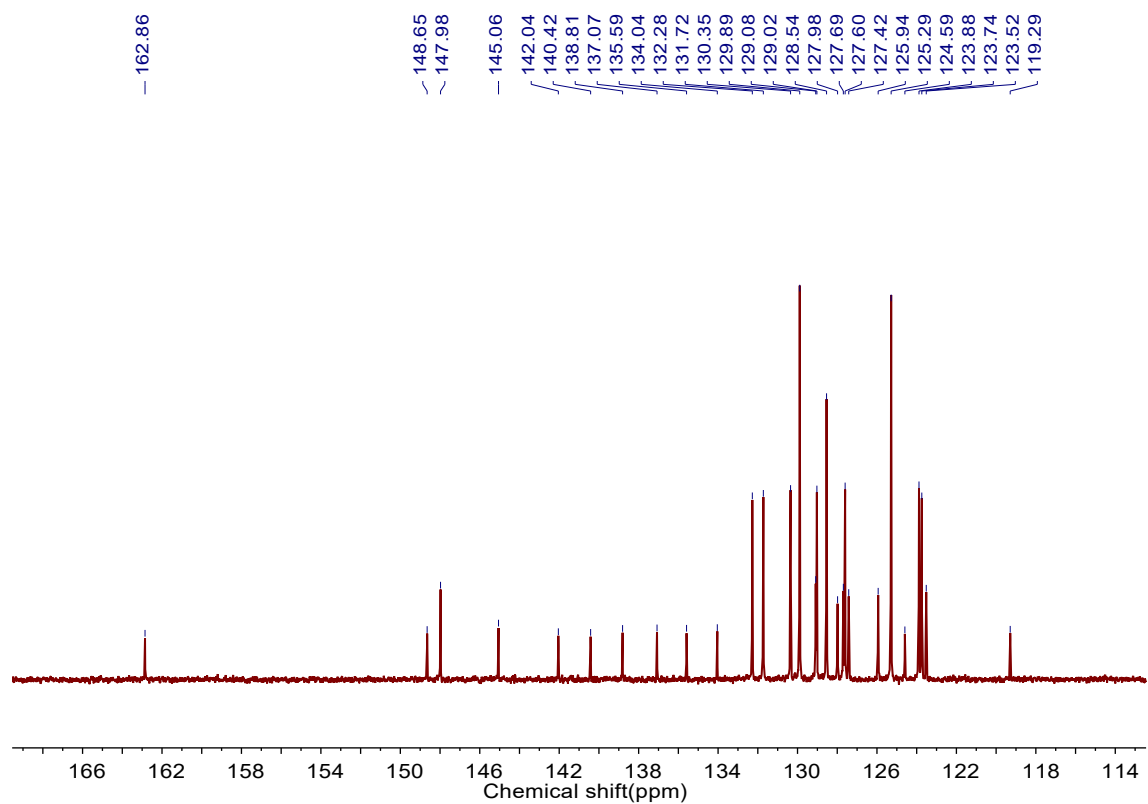

Figure S32. The  $^{13}\text{C}$  NMR spectra of PADP-TPA in  $\text{CD}_2\text{Cl}_2$ .

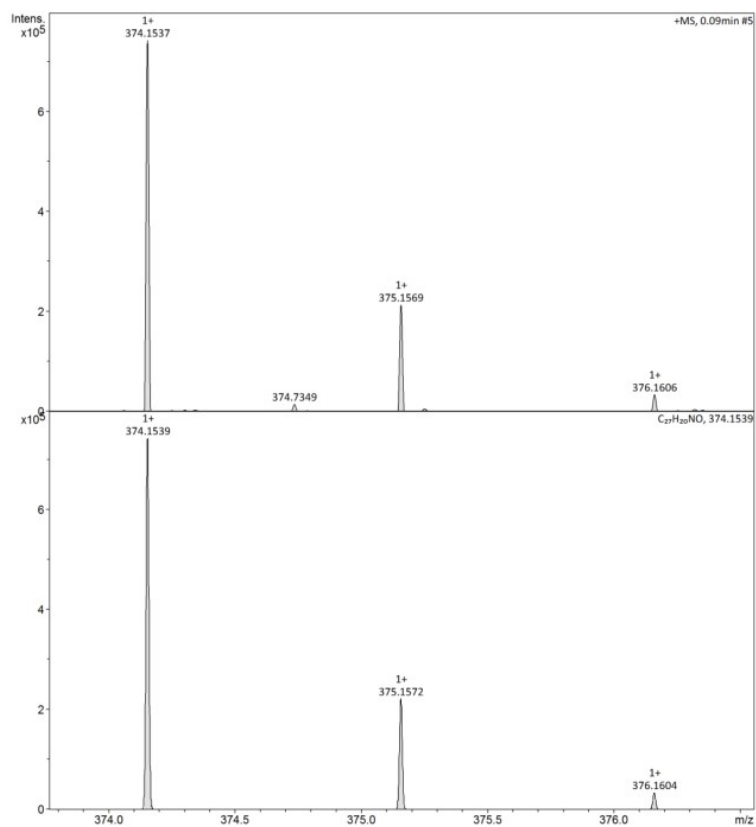

**Figure S33.** High resolution mass spectra (HRMS) of PADP.

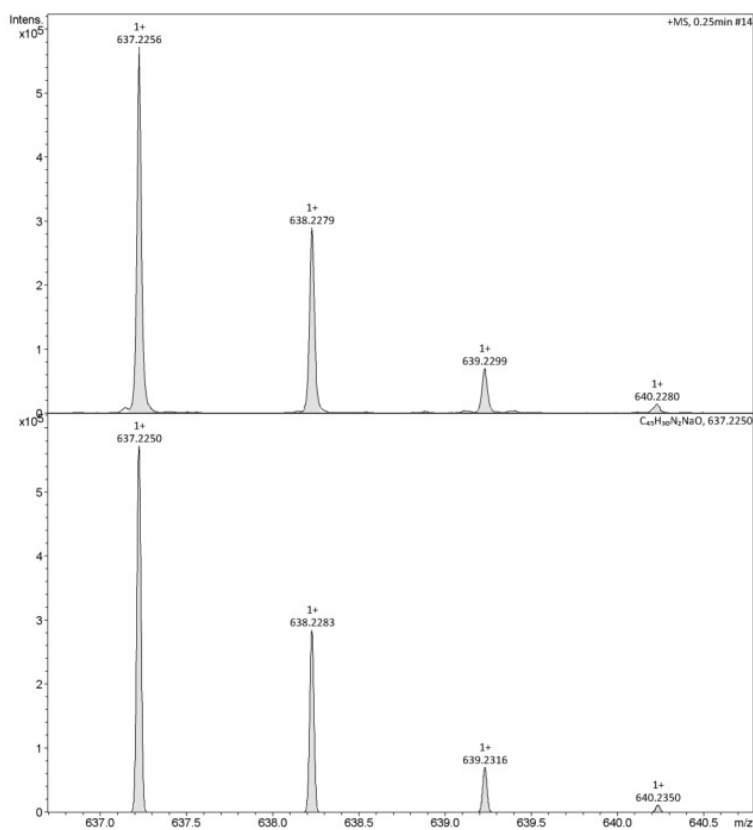

**Figure S34.** High resolution mass spectra (HRMS) of PADP-pCz.

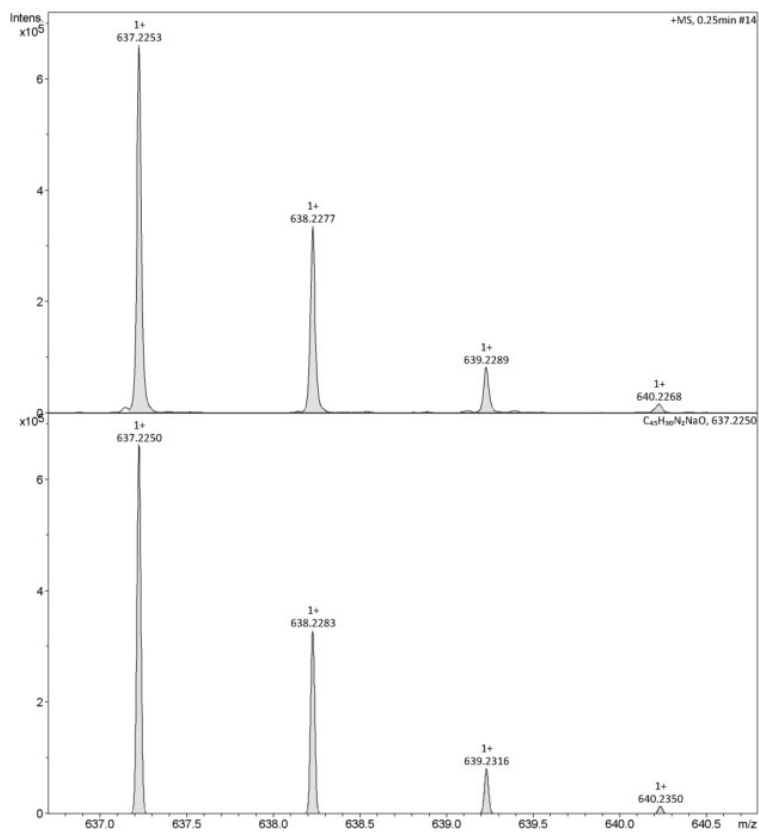

**Figure S35.** High resolution mass spectra (HRMS) of PADP-mCz.

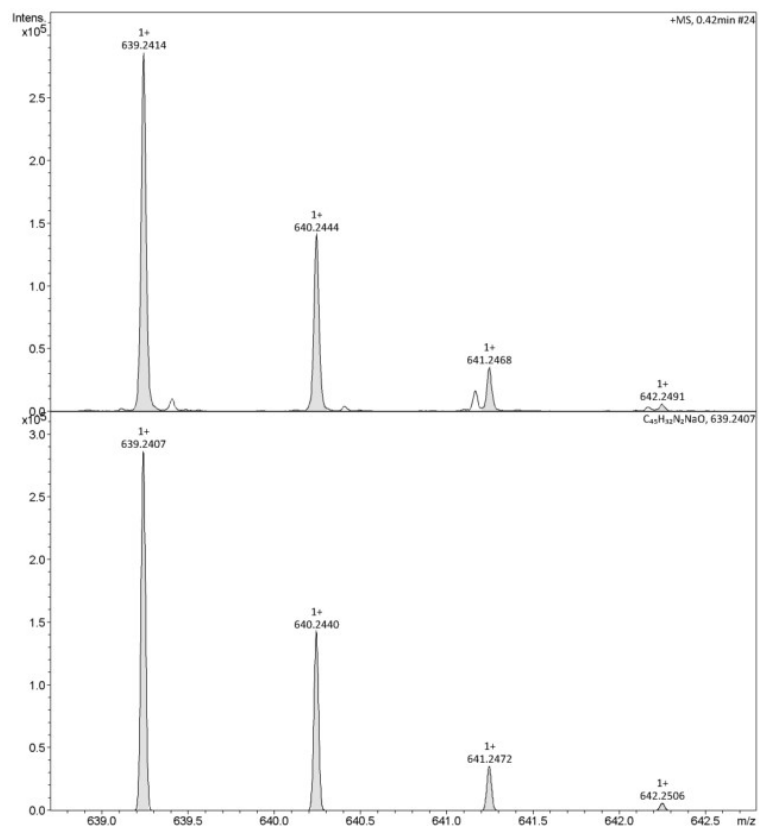

**Figure S36.** High resolution mass spectra (HRMS) of PADP-TPA.

## S-8 Reference

- [1] A. Islam, D. Zhang, L. Hong, H. Cui, Q. Wei, L. Duan, R. Peng, X. Ouyang, Z. Ge, *J. Photochem. Photobiol. A: Chemistry* 2018, **359**, 87.
- [2] J. Huang, N. Sun, Y. Dong, R. Tang, P. Lu, P. Cai, Q. Li, D. Ma, J. Qin, Z. Li, *Adv. Funct. Mater.* 2013, **23**, 2329.
- [3] J. Yang, J. Huang, N. Sun, Q. Peng, Q. Li, D. Ma, Z. Li, *Chemistry* 2015, **21**, 6862.
- [4] C. Wang, L. Li, X. Zhan, Z. Ruan, Y. Xie, Q. Hu, S. Ye, Q. Li, Z. Li, *Sci. Bull.* 2016, **61**, 1746.
- [5] W. Feng, Q. Su, Y. Ma, Zoran Džolić, F. Huang, Z. Wang, S. Chen, B. Z. Tang, *J. Org. Chem.* 2020, **85**, 158–167.
- [6] L. Pan, H. Wu, J. Liu, K. Xue, W. Luo, P. Chen, Z. Wang, A. Qin, B. Z. Tang, *Adv. Optical Mater.* 2019, **7**, 1801673.
- [7] H. Wu, J. Zeng, Z. Xu, B. Zhang, H. Zhang, Y. Pan, Z. Wang, D. Ma, A. Qin, B. Z. Tang, *J. Mater. Chem. C* 2019, **7**, 13047—13051.
- [8] H. Wu, G. Li, J. Luo, T. Chen, Y. Ma, Z. Wang, A. Qin, B. Z. Tang, *Adv. Optical Mater.* 2021, **9**, 2101085.
- [9] Z. Xu, J. Gu, X. Qiao, A. Qin, B. Z. Tang, D. Ma, *ACS Photonics* 2019, **6**, 767–778.
- [10] P. Han, C. Lin, D. Ma, A. Qin, B. Z. Tang, *ACS Appl. Mater. Interfaces* 2020, **12**, 46366–4637.
- [11] C. Lin, P. Han, S. Xiao, F. Qu, J. Yao, X. Qiao, D. Yang, Y. Dai, Q. Sun, D. Hu, A. Qin, Y. Ma, B. Z. Tang, D. Ma, *Adv. Funct. Mater.* 2021, **31**, 2106912.
- [12] P. Han, Z. Xu, C. Lin, D. Ma, A. Qin, B. Z. Tang, *J. Mater. Chem. C* 2020, **8**, 7012—7018.
- [13] M. Bian, Z. Zhao, Y. Li, Q. Li, Z. Chen, D. Zhang, S. Wang, Z. Bian, Z. Liu, L. Duan, L. Xiao, *J. Mater. Chem. C* 2018, **6**, 745—753.
- [14] Y. Cai, C. Shi, H. Zhang, B. Chen, K. Samedov, M. Chen, Z. Wang, Z. Zhao, X. Gu, D. Ma, A. Qin, B. Z. Tang, *J. Mater. Chem. C* 2018, **6**, 6534—6542.
- [15] J. Yang, Q. Guo, Z. Ren, X. Gao, Q. Peng, Q. Li, D. Ma, Z. Li, *J. Mater. Chem. C* 2017, **5**, 6185—6192.
- [16] J. Huang, N. Sun, J. Wang, R. Tang, X. Li, J. Dong, Q. Li, D. Ma, Z. Li, *Isr. J. Chem.* 2014,

54, 931–934.

[17] S. Liu, F. He, H. Wang, H. Xu, C. Wang, F. Li, Y. Ma, *J. Mater. Chem.* 2008, **18**, 4802–4807.

[18] W. Qin, Z. Yang, Y. Jiang, J. W. Y. Lam, G. Liang, H. S. Kwok, B. Z. Tang, *Chem. Mater.* 2015, **27**, 3892–3901.

[19] J. Yang, N. Sun, J. Huang, Q. Li, Q. Peng, X. Tang, Y. Dong, D. Ma, Z. Li, *J. Mater. Chem. C* 2015, **3**, 2624–2631.

[20] X. Zhan, N. Sun, Z. Wu, J. Tu, L. Yuan, X. Tang, Y. Xie, Q. Peng, Y. Dong, Qi. Li, D. Ma, Z. Li, *Chem. Mater.* 2015, **27**, 1847–1854.

[21] X. Zhan, Z. Wu, Y. Lin, Y. Xie, Q. Peng, Q. Li, D. Ma, Z. Li, *Chem. Sci.* 2016, **7**, 4355–4363.

[22] J. Lou, G. Li, X. Guo, B. Li, D. Yang, H. Zhang, Z. Wang, B. Z. Tang, *Small* 2024, **20**, 2308468.
